# Towards achieving a vaccine-derived herd immunity threshold for COVID-19 in the U.S.

Abba B. Gumel<sup>†,††</sup> Enahoro A. Iboi<sup>◇</sup>, Calistus N. Ngonghala<sup>‡,‡‡,\*</sup> and Gideon A. Ngwa<sup>†††</sup>

<sup>†</sup> *School of Mathematical and Statistical Sciences, Arizona State University, Tempe, Arizona, 85287, USA.*

<sup>◇</sup> *Department of Mathematics, Spelman College, Atlanta, Georgia, 30314, USA.*

<sup>‡</sup> *Department of Mathematics, University of Florida, Gainesville, FL 32611, USA.*

<sup>‡‡</sup> *Emerging Pathogens Institute, University of Florida, Gainesville, FL 32610, USA.*

<sup>††</sup> *Department of Mathematics and Applied Mathematics, University of Pretoria, Pretoria 0002, South Africa.*

<sup>†††</sup> *Department of Mathematics, University of Buea, P.O. Box 63, Buea, Cameroon.*

## Abstract

A novel coronavirus emerged in December of 2019 (COVID-19), causing a pandemic that continues to inflict unprecedented public health and economic burden in all nooks and corners of the world. Although the control of COVID-19 has largely focused on the use of basic public health measures (primarily based on using non-pharmaceutical interventions, such as quarantine, isolation, social-distancing, face mask usage and community lockdowns), three safe and highly-effective vaccines (by AstraZeneca Inc., Moderna Inc. and Pfizer Inc., with protective efficacy of 70%, 94.1% and 95%, respectively) have been approved for use in humans since December 2020. We present a new mathematical model for assessing the population-level impact of the three currently-available anti-COVID vaccines that are administered in humans. The model stratifies the total population into two subgroups, based on whether or not they habitually wear face mask in public. The resulting multigroup model, which takes the form of a deterministic system of nonlinear differential equations, is fitted and parametrized using COVID-19 cumulative mortality data for the third wave of the COVID-19 pandemic in the U.S. Conditions for the asymptotic stability of the associated disease-free equilibrium, as well as expression for the vaccine-derived herd immunity threshold, are rigorously derived. Numerical simulations of the model show that the size of the initial proportion of individuals in the masks-wearing group, together with positive change in behaviour from the non-masks wearing group (as well as those in masks-wearing group do not abandon their masks-wearing habit) play a crucial role in effectively curtailing the COVID-19 pandemic in the U.S. This study further shows that the prospect of achieving herd immunity (required for COVID-19 elimination) in the U.S., using any of the three currently-available vaccines, is quite promising. In particular, while the use of the AstraZeneca vaccine will lead to herd immunity in the U.S. if at least 80% of the populace is vaccinated, such herd immunity can be achieved using either the Moderna or Pfizer vaccine if about 60% of the U.S. population is vaccinated. Furthermore, the prospect of eliminating the pandemic in the US in the year 2021 is significantly enhanced if the vaccination program is complemented with nonpharmaceutical interventions at moderate increased levels of compliance (in relation to their baseline compliance). The study further suggests that, while the waning of natural and vaccine-derived immunity against COVID-19 induces only a marginal increase in the burden and projected time-to-elimination of the pandemic, adding the impacts of the therapeutic benefits of the vaccines into the model resulted in a dramatic reduction in the burden and time-to-elimination of the pandemic.

**Keywords:** *COVID-19; vaccine; social-distancing; herd immunity; face mask; stability; reproduction number.*

## 1 Introduction

The novel coronavirus (COVID-19) pandemic, which started as a pneumonia of an unknown etiology late in December 2019 in the city of Wuhan, became the most devastating public health challenge mankind has faced since the 1918/1919 pandemic of influenza. The COVID-19 pandemic, which rapidly spread to essentially every nook

---

\*Corresponding author: Email: [calistusn@ufl.edu](mailto:calistusn@ufl.edu)

36 and corner of the planet, continues to inflict devastating public health and economic challenges globally. As of Jan-  
37 uary 24, 2021, the pandemic accounted for about 100 million confirmed cases and 2, 128, 721 cumulative mortality  
38 globally. Similarly, as of this date, the United States, which recorded its first COVID-19 case on January 20, 2020,  
39 recorded over 25, 123, 857 confirmed cases and 419, 204 deaths [1].

40 COVID-19, a member of the Coronavirus family of RNA viruses is primarily transmitted from human-to-  
41 human through inhalation of respiratory droplets from both symptomatic and asymptotically-infectious humans  
42 [2] (*albeit* there is limited evidence that COVID-19 can be transmitted *via* exhalation through normal breathing  
43 and aerosol [3]). The incubation period of the disease is estimated to lie between 2 to 14 days (with a mean of 5.1  
44 days), and majority of individuals infected with the disease show mild or no clinical symptoms [4]. The symptoms  
45 typically include coughing, fever and shortness of breath (for mild cases) and pneumonia for severe cases [4].  
46 The people most at risk of dying from, or suffering severe illness with, COVID-19 are those with co-morbidities  
47 (such as individuals with diabetes, obesity, kidney disease, cardiovascular disease, chronic respiratory disease,  
48 etc.). Younger people, front line healthcare workers and employees who maintain close contacts (within 6 feet)  
49 with customers and other co-workers (such as meat factory workers, retail store workers, etc.) are also at risk.

50 Prior to the approval of the three safe and effective vaccines (by AstraZeneca, Moderna and Pfizer) for use in  
51 humans in December 2020 [5, 6], the control and mitigation efforts against COVID-19 have been focused on the  
52 use of non-pharmaceutical interventions (NPIs), such as quarantine, self-isolation, social (physical) distancing, the  
53 use of face masks in public, hand washing (with approved sanitizers), community lockdowns, testing and contact  
54 tracing. Of these NPIs, the use of face masks in public was considered to be the main mechanism for effectively  
55 curtailing COVID-19 [4, 7–9]. Furthermore, owing to its limited supply, the approved anti-COVID drug *remdesivir*  
56 is reserved for use to treat individuals in hospital who display severe symptoms of COVID-19. The US started  
57 administering the Pfizer and Moderna vaccines by December 2020 [5, 6].

58 The Pfizer and Moderna vaccines, each offering a protective efficacy of about 95% [10–12], are genetic vaccines  
59 that trigger the immune system to recognize the coronavirus’ spike protein and develop antibodies against it [10,  
60 13]. Two doses are required for both the Pfizer and Moderna vaccines (one to prime the immune system, and the  
61 second to boost it). For the Pfizer vaccine, the second dose is administered 19–42 days after the first dose, while  
62 that for the Moderna vaccine is administered three to four weeks after the first dose. Both vaccines need to be  
63 stored at appropriate refrigeration temperatures [14]. The AstraZeneca vaccine, on the other hand, has estimated  
64 protective efficacy of 70% [10–12]. It uses a replication-deficient chimpanzee viral vector that contains the genetic  
65 material of the SARS-CoV-2 virus spike protein [12]. The AstraZeneca vaccine also requires two doses (one month  
66 apart) to achieve immunity, and unlike the Pfizer and Moderna vaccines, does not have to be stored in super-cold  
67 temperatures [12].

68 A vaccine, when effective, can offer different levels of protection to the vaccinated person, with the protection  
69 ranging from reducing or blocking probability of acquiring infection (for very effective vaccines) to reduction  
70 of severity of disease, hospitalization, and mortality and accelerating recovery in breakthrough infections (for  
71 vaccines that offer strong therapeutic benefits) [15, 16]. A vaccine that has protective ability, when introduced into  
72 a population during an epidemic, will have an important consequence on the progression of the epidemic, and its  
73 effective deployment would be dependent on the strategy used. Optimal vaccination outcomes can be achieved if  
74 the vaccination programs are well-conceived and monitored. In the absence of empirical data during the epidemic,  
75 mathematical models can offer a plausible pathway to predicting the effectiveness of targeted vaccination programs.  
76 The goal of this study is to design a structured mathematical model that will allow for the realistic assessment of the  
77 population-level impact of vaccination programs based on using the three vaccines, with emphasis on determining  
78 the optimal coverage rate needed to achieve vaccine-derived *herd immunity* (which is required for eliminating the  
79 pandemic). A secondary objective is to explore whether the prospect for eliminating the pandemic in the US will be  
80 enhanced if the vaccination program is combined with NPIs, such as social-distancing at some level of compliance.

81 Numerous mathematical models, of various types, have been developed and used to provide insight into the  
82 transmission dynamics and control of COVID-19. The modeling types used include statistical [17], compartmen-  
83 tal/deterministic (e.g., [4, 7–9, 18–20]), stochastic (e.g., [21, 22]), network (e.g., [23]) and agent-based (e.g., [24]).  
84 A notable feature of the model to be developed in this project is its multigroup nature. Specifically, the total pop-  
85 ulation will be subdivided into two groups, namely those who habitually wear face mask in public and those who

do not. Cumulative mortality data for COVID-19 pandemic in the U.S. will be used to parametrize the model. The expected outcome of the study is the determination of the minimum vaccine coverage level needed to effectively curtail (or eliminate) community transmission of COVID-19 in the U.S., and quantify the reduction in the required vaccine coverage if the vaccination program is supplemented with face masks usage (under various face masks efficacy and compliance parameter space). The rest of the paper is organized as follows. The novel multigroup model is formulated in Section 2. The parameters of the model are also estimated, based on fitting the model with U.S. COVID-19 mortality data for the third wave of the pandemic. The model is rigorously analysed, with respect to the asymptotic stability of the disease-free equilibrium of the model, in Section 3. A condition for achieving community-wide vaccine-derived herd immunity is also derived. Numerical simulations of the model are reported in Section 4. Discussions and concluding remarks are presented in Section 5.

## 2 Formulation of Mathematical Model

In order to account for heterogeneity in face masks usage in the community, the total population of individuals in the community at time  $t$ , denoted by  $N(t)$ , is split into the total sub-populations of individuals who do not habitually wear face mask in public (labeled “*non-mask users*”), denoted by  $N_1(t)$ , and the total sub-populations of those who habitually wear face mask in public (labeled “*mask users*”), represented by  $N_2(t)$ . That is,  $N(t) = N_1(t) + N_2(t)$ . Furthermore, the sub-population  $N_1(t)$  is sub-divided into the mutually-exclusive compartments of unvaccinated susceptible ( $S_{1u}(t)$ ), vaccinated susceptible ( $S_{1v}(t)$ ), exposed ( $E_1(t)$ ), pre-symptomatically-infectious ( $P_1(t)$ ), symptomatically-infectious ( $I_1(t)$ ), asymptotically-infectious ( $A_1(t)$ ), hospitalized ( $H_1(t)$ ) and recovered ( $R_1(t)$ ) individuals, so that

$$N_1(t) = S_{1u}(t) + S_{1v}(t) + E_1(t) + P_1(t) + I_1(t) + A_1(t) + H_1(t) + R_1(t).$$

Similarly, the total sub-population of the mask users,  $N_2(t)$ , is stratified into the compartments for unvaccinated susceptible ( $S_{2u}(t)$ ), vaccinated susceptible ( $S_{2v}(t)$ ), exposed ( $E_2(t)$ ), pre-symptomatically-infectious ( $P_2(t)$ ), symptomatically-infectious ( $I_2(t)$ ), asymptotically-infectious ( $A_2(t)$ ), hospitalized ( $H_2(t)$ ) and recovered ( $R_2(t)$ ) individuals. Hence,

$$N_2(t) = S_{2u}(t) + S_{2v}(t) + E_2(t) + P_2(t) + I_2(t) + A_2(t) + H_2(t) + R_2(t).$$

### 2.1 Infection Rates

In this section, the functional form of the infection rate (or effective contact rate) for a susceptible individual in group 1 or 2 will be derived. The model to be formulated has four infectious classes, namely the classes for pre-symptomatic ( $P_i$ ), symptomatic ( $I_i$ ), asymptomatic ( $A_i$ ) and hospitalized ( $H_i$ ) individuals ( $i = 1, 2$ ). Hence, the rate at which an individual in group  $i$  acquires infection from an infectious individual in any of the four infectious classes is given by the average number of contacts *per* unit time (measured in days) for susceptible individuals (denoted by  $c_k$ ; with  $k = \{P_i, I_i, A_i, H_i\}$  and  $i = 1, 2$ ), *times* the sum (over all infectious compartments in group  $i$ ) of the probability of transmission *per* contact with an infectious individual in group  $i$  (denoted by  $\hat{\beta}_i$ ) *times* the probability that a random infectious contact the susceptible individual makes is with an infectious individual in group  $i$  (denoted by  $\rho_k$ ).

Let  $c_k$  be the average number of contacts an individual in epidemiological compartment  $k$  makes *per* unit time. It then follows that the probability that a random contact this individual makes is with someone else in epidemiological compartment  $k$  is given by the total number contacts made by everyone in that compartment, denoted by  $c_{ki}$ , divided by the total number of contacts for the entire population. That is,  $\rho_k = \frac{c_{ki}}{c_{total}}$ , where

$$c_{total} = c_{S_{1u}}S_{1u}(t) + c_{S_{1v}}S_{1v}(t) + c_{E_1}E_1(t) + c_{P_1}P_1(t) + c_{I_1}I_1(t) + c_{A_1}A_1(t) + c_{H_1}H_1(t) + c_{R_1}R_1(t), \quad i = 1, 2.$$

119 Based on the above definitions, it follows that the infection rate of a susceptible individual in group  $i$ , denoted by  
 120  $\lambda_i$  ( $i = 1, 2$ ), is given by

$$\begin{aligned} \lambda_1 = & c_{S1u} \left[ \frac{\hat{\beta}_{P_1} c_{P_1} P_1 + \hat{\beta}_{I_1} c_{I_1} I_1 + \hat{\beta}_{A_1} c_{A_1} A_1 + \hat{\beta}_{H_1} c_{H_1} H_1}{c_{total}} \right] \\ & + c_{S1v} (1 - \varepsilon_o) \left[ \frac{\hat{\beta}_{P_2} c_{P_2} P_2 + \hat{\beta}_{I_2} c_{P_2} I_2 + \hat{\beta}_{A_2} c_{A_2} A_2 + \hat{\beta}_{H_2} c_{H_2} H_2}{c_{total}} \right], \end{aligned} \quad (2.1)$$

121 Similarly, the infection rate for a susceptible individual in group 2, denoted by  $\lambda_2$ , is given by:

$$\begin{aligned} \lambda_2 = & (1 - \varepsilon_i) c_{S2u} \left[ \frac{\hat{\beta}_{P_1} c_{P_1} P_1 + \hat{\beta}_{I_1} c_{I_1} I_1 + \hat{\beta}_{A_1} c_{A_1} A_1 + \hat{\beta}_{H_1} c_{H_1} H_1}{c_{total}} \right] \\ & + c_{S2v} (1 - \varepsilon_i) (1 - \varepsilon_o) \left[ \frac{\hat{\beta}_{P_2} c_{P_2} P_2 + \hat{\beta}_{I_2} c_{P_2} I_2 + \hat{\beta}_{A_2} c_{A_2} A_2 + \hat{\beta}_{H_2} c_{H_2} H_2}{c_{total}} \right]. \end{aligned} \quad (2.2)$$

122 In (2.1) and (2.2), the parameters  $0 < \varepsilon_o < 1$  and  $0 < \varepsilon_i < 1$  represent the outward and inward protective efficacy,  
 123 respectively, of face masks to prevent the transmission of infection to a susceptible individual ( $\varepsilon_o$ ) as well as prevent  
 124 the acquisition of infection ( $\varepsilon_i$ ) from an infectious individual. For mathematical tractability (needed to reduce the  
 125 number of parameters of the model to be developed), we assume that every member of the population has the same  
 126 number of contacts. That is, we assume that  $c_{S1u} = c_{S1v} = \dots = c_{R2} = k_c$ . Hence,  $c_{total} = k_c N(t)$ . Let  
 127  $\beta_k = \hat{\beta}_k k_c$ . Using this definition of  $\beta_k$  and  $c_{total} = k_c N$  in Equations (2.1) and (2.2) gives, respectively,

$$\lambda_1 = \left[ \frac{\beta_{P_1} P_1 + \beta_{I_1} I_1 + \beta_{A_1} A_1 + \beta_{H_1} H_1}{N} + (1 - \varepsilon_o) \frac{\beta_{P_2} P_2 + \beta_{I_2} I_2 + \beta_{A_2} A_2 + \beta_{H_2} H_2}{N} \right], \quad (2.3)$$

128 and,

$$\lambda_2 = (1 - \varepsilon_i) \left[ \frac{\beta_{P_1} P_1 + \beta_{I_1} I_1 + \beta_{A_1} A_1 + \beta_{H_1} H_1}{N} + (1 - \varepsilon_o) \frac{\beta_{P_2} P_2 + \beta_{I_2} I_2 + \beta_{A_2} A_2 + \beta_{H_2} H_2}{N} \right]. \quad (2.4)$$

## 129 2.2 Equations of Mathematical Model

130 Before giving the equations for the two-group vaccination model, it is important to recall that vaccination against  
 131 COVID-19 in the US is administered to individuals of a certain eligible age (e.g., 12 years of age and older for  
 132 the Pfizer vaccine and 18 years of age and older for the Moderna vaccine). Consequently, in formulating a model  
 133 that incorporates COVID-19 vaccines, it is important that demographic parameters (birth and natural death) are  
 134 included to account for the new cohort of susceptible individuals that reach the minimum eligible age for receiving  
 135 the vaccine. The equations for the rate of change of the sub-populations of non-mask users (i.e., individuals in  
 136 group 1) is given by the following deterministic system of nonlinear differential equations (where a dot represents  
 137 differentiation with respect to time  $t$ ):

$$\begin{aligned} \dot{S}_{1u} &= \Pi + \alpha_{21} S_{2u} - \lambda_1 S_{1u} - (\alpha_{12} + \xi_v + \mu) S_{1u}, \\ \dot{S}_{1v} &= \xi_v S_{1u} + \alpha_{21} S_{2v} - (1 - \varepsilon_v) \lambda_1 S_{1v} - (\alpha_{12} + \mu) S_{1v}, \\ \dot{E}_1 &= \lambda_1 S_{1u} + (1 - \varepsilon_v) \lambda_1 S_{1v} + \alpha_{21} E_2 - (\alpha_{12} + \sigma_1 + \mu) E_1, \\ \dot{P}_1 &= \sigma_1 E_1 + \alpha_{21} P_2 - (\alpha_{12} + \sigma_P + \mu) P_1, \\ \dot{I}_1 &= r \sigma_P P_1 + \alpha_{21} I_2 - (\alpha_{12} + \phi_{1I} + \gamma_{1I} + \mu + \delta_{1I}) I_1, \\ \dot{A}_1 &= (1 - r) \sigma_P P_1 + \alpha_{21} A_2 - (\alpha_{12} + \gamma_{1A} + \mu) A_1, \\ \dot{H}_1 &= \phi_{1I} I_1 + \alpha_{21} H_2 - (\alpha_{12} + \gamma_{1H} + \mu + \delta_{1H}) H_1, \\ \dot{R}_1 &= \gamma_{1I} I_1 + \gamma_{1A} A_1 + \gamma_{1H} H_1 + \alpha_{21} R_2 - (\alpha_{12} + \mu) R_1. \end{aligned} \quad (2.5)$$

138 where,  $\lambda_1$  is as defined in (2.3).

139 In Equation (2.5), the parameter  $\Pi$  is the recruitment rate into the population (this parameter also captures  
 140 the inflow of new susceptible individuals that have reached the minimum eligibility age for getting a vaccine).  
 141 Furthermore,  $\alpha_{21}$  is the rate at which individuals in the habitual mask-wearing group 2 change their behavior  
 142 and move to the non-masking group 1, and  $\alpha_{12}$  is the rate at which individuals in group 1 change their non-  
 143 masking behavior and move to group 2. For mathematical tractability, we do not distinguish the change of behavior  
 144 parameters ( $\alpha_{12}$  and  $\alpha_{21}$ ) for unvaccinated and vaccinated individuals, and we assume that all recruited individuals  
 145 (at the rate  $\Pi$ ) are initially in the non-masking group. The parameter  $\xi_v$  represents the *per capita* vaccination  
 146 rate, and the vaccine is assumed to induce protective efficacy  $0 < \varepsilon_v < 1$  in all vaccinated individuals (i.e., the  
 147 vaccine is imperfect). Natural deaths occurs in all epidemiological classes at a rate  $\mu$ . Individuals in the  $E_1$  class  
 148 progress to the pre-symptomatic stage at a rate  $\sigma_1$ , and those in the pre-symptomatic class ( $P_1$ ) transition out of  
 149 this class at a rate  $\sigma_P$  (a proportion,  $q$ , of which become symptomatic, and move to the  $I$  class at a rate  $q\sigma_P$ , and  
 150 the remaining proportion,  $1 - q$ , move to the asymptotically-infectious class at a rate  $(1 - q)\sigma_P$ ). Symptomatic  
 151 infectious individuals are hospitalized at a rate  $\phi_{1I}$ . They recover at a rate  $\gamma_{1I}$  and die due to the disease at a rate  
 152  $\delta_{1I}$ . Hospitalized individuals die of the disease at the rate  $\delta_{1H}$ .

153 Similarly, the equations for the rate of change of the sub-populations of mask users (i.e., individuals in group  
 154 2) is given by the following system of nonlinear differential equations:

$$\begin{aligned}
 \dot{S}_{2u} &= \alpha_{12}S_{1u} - \lambda_2S_{2u} - (\alpha_{21} + \xi_v + \mu)S_{2u}, \\
 \dot{S}_{2v} &= \xi_vS_{2u} + \alpha_{12}S_{1v} - (1 - \varepsilon_v)\lambda_2S_{2v} - (\alpha_{21} + \mu)S_{2v}, \\
 \dot{E}_2 &= \lambda_2S_{2u} + (1 - \varepsilon_v)\lambda_2S_{2v} + \alpha_{12}E_1 - (\alpha_{21} + \sigma_2 + \mu)E_2, \\
 \dot{P}_2 &= \sigma_2E_2 + \alpha_{12}P_1 - (\alpha_{21} + \sigma_P + \mu)P_2, \\
 \dot{I}_2 &= q\sigma_PP_2 + \alpha_{12}I_1 - (\alpha_{21} + \phi_{2I} + \gamma_{2I} + \mu + \delta_{2I})I_2, \\
 \dot{A}_2 &= (1 - q)\sigma_PP_2 + \alpha_{12}A_1 - (\alpha_{21} + \gamma_{2A} + \mu)A_2, \\
 \dot{H}_2 &= \phi_{2I}I_2 + \alpha_{12}H_1 - (\alpha_{21} + \gamma_{2H} + \mu + \delta_{2H})H_2, \\
 \dot{R}_2 &= \gamma_{2I}I_2 + \gamma_{2A}A_2 + \gamma_{2H}H_2 + \alpha_{12}R_1 - (\alpha_{21} + \mu)R_2,
 \end{aligned} \tag{2.6}$$

155 with  $\lambda_2$  defined in (2.4). Thus, Equations (2.5) and (2.6) represent the multi-group model for assessing the pop-  
 156 ulation impact of face masks usage and vaccination on the transmission dynamics and control of COVID-19 in a  
 157 community. The flow diagram of the model  $\{(2.5), (2.6)\}$  is depicted in Figure 1 (the state variables and parameters  
 158 of the model are described in Tables 1 and 2, respectively).

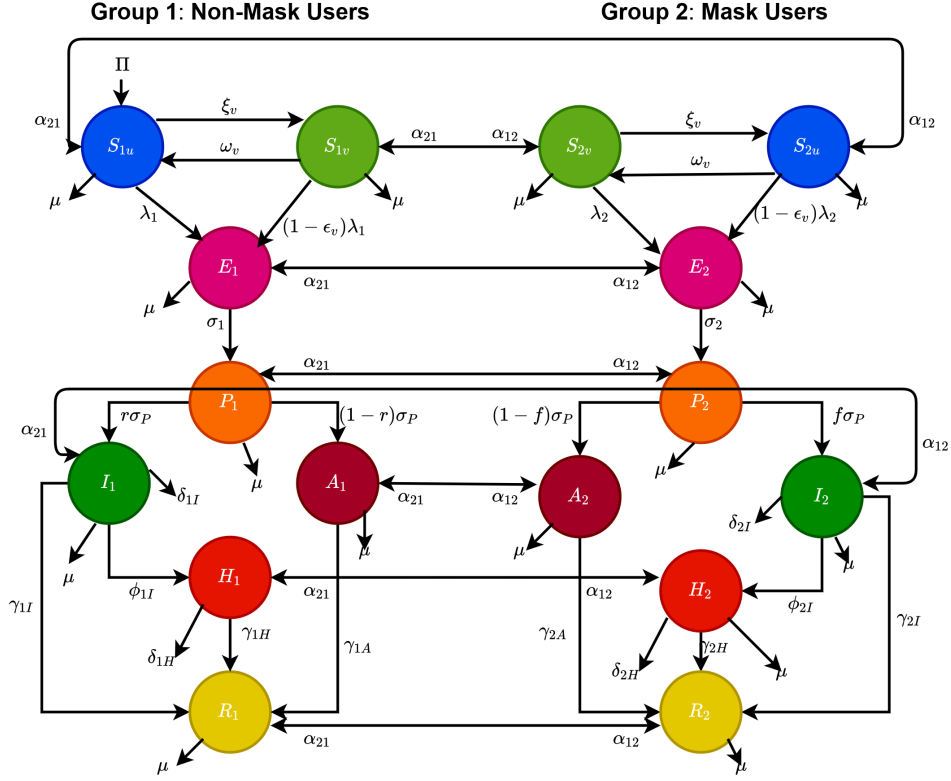

Figure 1: Flow diagram of the model  $\{(2.5), (2.6)\}$ .

Table 1: Description of the state variables of the model  $\{(2.5), (2.6)\}$ .

| State variable | Description                                                                                |
|----------------|--------------------------------------------------------------------------------------------|
| $S_{1u}$       | Population of non-vaccinated susceptible individuals who do not habitually wear face masks |
| $S_{2u}$       | Population of non-vaccinated susceptible individuals who habitually face masks             |
| $S_{1v}$       | Population of vaccinated susceptible individuals who do not habitually wear face masks     |
| $S_{2v}$       | Population of vaccinated susceptible individuals who habitually wear face masks            |
| $E_1$          | Population of exposed (newly-infected) individuals who do not habitually wear face masks   |
| $E_2$          | Population of exposed (newly-infected) individuals who habitually wear face masks          |
| $P_1$          | Population of pre-symptomatic infectious individuals who do not habitually wear face masks |
| $P_2$          | Population of pre-symptomatic infectious individuals who habitually wear face masks        |
| $I_1$          | Population of symptomatically-infectious individuals who do not habitually wear face masks |
| $I_2$          | Population of symptomatically-infectious individuals who habitually wear face masks        |
| $A_1$          | Population of asymptotically-infectious individuals who do not habitually wear face masks  |
| $A_2$          | Population of asymptotically-infectious individuals who habitually wear face masks         |
| $H_1$          | Population of hospitalized individuals who do not habitually wear face masks               |
| $H_2$          | Population of hospitalized individuals who habitually wear face masks                      |
| $R_1$          | Population of recovered individuals who do not habitually wear face masks                  |
| $R_2$          | Population of recovered individuals who habitually wear face masks                         |

159 The multi-group model  $\{(2.5), (2.6)\}$  is an extension of the two-group mask-use model in [7] by, *inter alia*:

- 160 (i) allowing for back-and-forth transitions between the two groups (mask-users and non-mask-users), to account  
 161 for human behavioral changes *vis a vis* decision to either be (or not to be) a face mask user in public;

- 162 (ii) incorporating an imperfect vaccine, which offers protective efficacy ( $0 < \varepsilon_v < 1$ ) against acquisition of  
163 COVID-19 infection;
- 164 (iii) allowing for disease transmission by pre-symptomatic and asymptotically-infectious individuals.

Table 2: Description of the parameters of the model  $\{(2.5), (2.6)\}$ .

| Parameters                 | Description                                                                                                                        |
|----------------------------|------------------------------------------------------------------------------------------------------------------------------------|
| $\Pi$                      | Recruitment rate into the population                                                                                               |
| $\mu$                      | Natural mortality rate                                                                                                             |
| $\beta_{P1}(\beta_{P2})$   | Effective contact rate for pre-symptomatic individuals who do not wear (wear) face masks                                           |
| $\beta_{I1}(\beta_{I2})$   | Effective contact rate for infectious symptomatic individuals who do not wear (wear) face masks                                    |
| $\beta_{A1}(\beta_{A2})$   | Effective contact rate for symptomatically-infectious individuals who do not wear (wear) face masks                                |
| $\beta_{H1}(\beta_{H2})$   | Effective contact rate for hospitalized individuals who do not wear (wear) face masks                                              |
| $0 < \epsilon_0 < 1$       | Outward protective efficacy of face masks                                                                                          |
| $0 < \epsilon_i < 1$       | Inward protective efficacy of face masks                                                                                           |
| $\alpha_{12}$              | Rate at which non-habitual face masks wearers choose to become habitual wearers                                                    |
| $\alpha_{21}$              | Rate at which habitual face masks wearers choose to become non-habitual wearers                                                    |
| $\xi_v$                    | <i>Per capita</i> vaccination rate                                                                                                 |
| $0 < \varepsilon_v < 1$    | Protective efficacy of the vaccine                                                                                                 |
| $\sigma_1(\sigma_2)$       | Rate at which exposed individuals who do not wear (wear) face masks progress to the corresponding pre-symptomatic infectious stage |
| $\sigma_P$                 | Rate at which pre-symptomatic infectious individuals progress to symptomatically-infectious or asymptotically-infectious stage     |
| $r(q)$                     | Proportion of pre-symptomatic infectious individuals who do not wear (wear) face masks that become symptomatically-infectious      |
| $\phi_{1I}(\phi_{2I})$     | Hospitalization rate for symptomatically-infectious individuals who do not wear (wear) face masks                                  |
| $\gamma_{1A}(\gamma_{2A})$ | Recovery rate for asymptotically-infectious individuals who do not wear (wear) face masks                                          |
| $\gamma_{1I}(\gamma_{2I})$ | Recovery rate for symptomatically-infectious individuals who do not wear (wear) face masks                                         |
| $\gamma_{1H}(\gamma_{2H})$ | Recovery rate for hospitalized individuals who do not wear (wear) face masks                                                       |
| $\delta_{1I}(\delta_{2I})$ | Disease-induced mortality rate for symptomatically-infectious individuals who do not wear (wear) face masks                        |
| $\delta_{1H}(\delta_{2H})$ | Disease-induced mortality rate for hospitalized individuals who do not wear (wear) face masks                                      |

### 165 2.3 Data Fitting and Parameter Estimation

166 In this section, cumulative COVID-19 mortality data for the U.S. (for the period October 12, 2020 to January  
167 20, 2021) will be used to fit the model (2.5)-(2.6) in the absence of vaccination. The fitting will allow us to estimate  
168 some of the key (unknown) parameters of the model. In particular, the parameters to be estimated from  
169 the data are the community transmission rate for individuals who do not wear face masks in public ( $\beta_1$ ), the  
170 transmission rate for individuals who habitually wear face masks in public ( $\beta_2$ ), the inward efficacy of masks in

171 preventing disease acquisition by susceptible individuals who habitually wear face masks ( $\varepsilon_i$ ), the outward efficacy  
172 of masks to prevent the spread of disease by infected individuals who habitually wear face masks ( $\varepsilon_o$ ), the rate  
173 at which people who do not wear masks adopt a mask-wearing habit ( $\alpha_{12}$ ), the rate at which those who habitu-  
174 ally wear face masks stop wearing masks in public ( $\alpha_{21}$ ), and the mortality rates of symptomatic infectious and  
175 hospitalized individuals ( $\delta_i$  and  $\delta_h$ , respectively). It should be mentioned that modification parameters  $\eta_P$ ,  $\eta_I$ ,  $\eta_A$ ,  
176 and  $\eta_H$  relating to disease transmission by pre-symptomatic infectious, symptomatic infectious, asymptomatic  
177 infectious and hospitalized individuals, respectively, are introduced in the forces of infection  $\lambda_1$  and  $\lambda_2$ , so that  
178  $\beta_j = \eta_j \beta_k$  ( $j \in \{P_k, I_k, A_k, H_k\}, k \in \{1, 2\}$ ). The model was fitted using a standard nonlinear least squares  
179 approach, which involved using the inbuilt MATLAB minimization function “*lsqcurvefit*” to minimize the sum of  
180 the squared differences between each observed cumulative mortality data point and the corresponding cumulative  
181 mortality point obtained from the model (2.5)-(2.6) in the absence of vaccination [4, 25, 26]. The choice of mor-  
182 tality over case data is motivated by the fact that mortality data for COVID-19 is more reliable than case data (see  
183 [8] for details). The estimated values of the fitted parameters, together with their 95% confidence intervals, are  
184 tabulated in Table 3. The (fixed) values of the remaining parameters of the model are tabulated in Table 4. Figure  
185 2 depicts the fitting of the model to the observed cumulative COVID-19 mortality data for the U.S. Furthermore,  
186 Figure 2 compares the simulations of the model using the fitted (estimated) and fixed parameters (given in Tables  
187 3 and 4) with the observed daily COVID-19 mortality for the US.

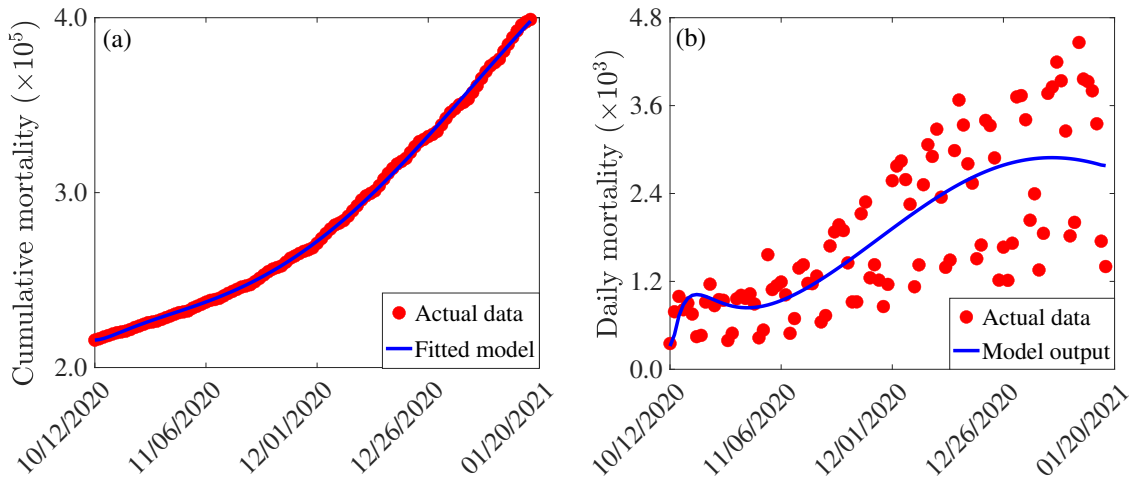

Figure 2: (a) Observed cumulative mortality (red dots), and the predicted cumulative mortality (blue curve) for the U.S. generated using the model (2.5)-(2.6) (in the absence of vaccination) for the period from October 12, 2020 to January 20, 2021. (b) Simulations of the model (2.5)-(2.6) (without vaccination) using the estimated (fitted) and fixed parameters tabulated in Tables 3 and 4, respectively.



Table 3: Estimated (fitted) parameter values and their 95% confidence intervals for the model (2.5)-(2.6) in the absence of vaccination, using COVID-19 mortality data for the US for the period from October 12, 2020 January 20, 2021.

| Parameter       | Value                    | Confidence interval                  |
|-----------------|--------------------------|--------------------------------------|
| $\beta_1$       | 0.224334/day             | [0.201828, 0.370926]/day             |
| $\beta_2$       | 0.072957/day             | [0.000002, 0.178140]/day             |
| $\varepsilon_o$ | 0.507666 (dimensionless) | [0.282518, 0.692441] (dimensionless) |
| $\varepsilon_i$ | 0.623667 (dimensionless) | [0.020807, 0.999999] (dimensionless) |
| $\alpha_{12}$   | 0.006229/day             | [0.004732, 0.008508]/day             |
| $\alpha_{21}$   | 0.000798/day             | [0.000000, 0.000999]/day             |
| $\delta_i$      | 0.000573/day             | [0.000000, 0.002399]/day             |
| $\delta_h$      | 0.009505/day             | [0.000708, 0.011030]/day             |

Table 4: Baseline values of the fixed parameters of the model (2.5)-(2.6).

| Parameter                 | Value                    | Source   | Parameter       | Value                      | Source    |
|---------------------------|--------------------------|----------|-----------------|----------------------------|-----------|
| $\sigma_1$ ( $\sigma_2$ ) | 1/2.5 (1/2.5)/day        | [27, 28] | $\Pi$           | $1.2 \times 10^4$ /day     | Estimated |
| $\sigma_p$                | 1/2.5/day                | [27, 28] | $\mu$           | $1/(79 \times 365)$ /day   | Estimated |
| $r$ ( $q$ )               | 0.2(0.2) (dimensionless) | [29, 30] | $\eta_P$        | 1.25 (dimensionless)       | Assumed   |
| $\phi_{1I}$               | 1/6/day                  | [31]     | $\eta_I$        | 1.0 (dimensionless)        | Assumed   |
| $\phi_{2I}$               | 1/6/day                  | [31]     | $\eta_A$        | 1.50 (dimensionless)       | Assumed   |
| $\gamma_I$                | 1/10/day                 | [24, 32] | $\eta_H$        | 0.25 (dimensionless)       | Assumed   |
| $\gamma_A$                | 1/5/day                  | [31]     | $\xi_v$         | $2.97 \times 10^{-4}$ /day | Assumed   |
| $\gamma_H$                | 1/8/day                  | [24]     | $\varepsilon_v$ | 0.70 (dimensionless)       | [11, 12]  |

### 3 Mathematical Analysis

Since the model {(2.5), (2.6)} monitors the temporal dynamics of human populations, all state variables and parameters of the model are non-negative. Consider the following biologically-feasible region for the model:

$$\Omega = \left\{ (S_{1u}, S_{1v}, S_{2u}, S_{2v}, E_1, E_2, P_1, P_2, I_1, I_2, A_1, A_2, H_1, H_2, R_1, R_2) \in \mathbf{R}_+^{16} : N(t) \leq \frac{\Pi}{\mu} \right\}. \quad (3.1)$$

**Theorem 3.1.** *The region  $\Omega$  is positively-invariant with respect to the model {(2.5), (2.6)}.*

*Proof.* Adding all the equations of the model {(2.5), (2.6)} gives

$$\dot{N} = \Pi - \mu N - \delta_{1I}I_1 - \delta_{1H}H_1 - \delta_{2I}I_2 - \delta_{2H}H_2. \quad (3.2)$$

Recall that all parameters of the model {(2.5), (2.6)} are non-negative. Thus, it follows, from (3.2), that

$$\dot{N} \leq \Pi - \mu N. \quad (3.3)$$

Hence, if  $N > \frac{\Pi}{\mu}$ , then  $\dot{N} < 0$ . Furthermore, by applying a standard comparison theorem [33] on (3.3), we have:

$$N(t) \leq N(0)e^{-\mu t} + \frac{\Pi}{\mu}(1 - e^{-\mu t}).$$

In particular,  $N(t) \leq \frac{\Pi}{\mu}$  if  $N(0) \leq \frac{\Pi}{\mu}$ . If  $N(0) > \frac{\Pi}{\mu}$  (i.e.,  $N(0)$  is outside  $\Omega$ ), then  $N(t) > \frac{\Pi}{\mu}$ , for all  $t > 0$  but with  $\lim_{t \rightarrow \infty} N(t) = \frac{\Pi}{\mu}$  (and this type of solution trajectory strives to enter the region  $\Omega$ ). Thus, every solution of the

197 model  $\{(2.5), (2.6)\}$  with initial conditions in  $\Omega$  remains in  $\Omega$  for all time  $t > 0$ . In other words, the region  $\Omega$  is  
 198 positively-invariant and attracts all initial solutions of the model  $\{(2.5), (2.6)\}$ . Hence, it is sufficient to consider the  
 199 dynamics of the flow generated by  $\{(2.5), (2.6)\}$  in  $\Omega$  (where the model is epidemiologically- and mathematically  
 200 well-posed) [34].  $\square$

### 201 3.1 Asymptotic Stability of Disease-free Equilibrium

202 The model  $\{(2.5), (2.6)\}$  has a unique disease-free equilibrium (DFE), obtained by setting all the infected compart-  
 203 ments of the model to zero

$$\mathbb{E}_0 : (S_{1u}^*, S_{1v}^*, S_{2u}^*, S_{2v}^*, E_1^*, E_2^*, P_1^*, P_2^*, I_1^*, I_2^*, A_1^*, A_2^*, H_1^*, H_2^*, R_1^*, R_2^*) =$$

$$(S_{1u}^*, S_{1v}^*, S_{2u}^*, S_{2v}^*, 0, 0, 0, 0, 0, 0, 0, 0, 0, 0, 0, 0),$$

where,

$$S_{1u}^* = \frac{\Pi(\alpha_{21} + \xi_v + \mu)}{(\xi_v + \mu)(\xi_v + \alpha_{12} + \alpha_{21} + \mu)}, \quad S_{1v}^* = \frac{\Pi(\mu^2\xi_v + 2\mu\Pi\alpha_{21}\xi_v + \alpha_{21}^2\xi_v + \mu\xi_v^2 + \alpha_{21}^2\xi_v^2)}{\mu(\mu + \alpha_{12} + \alpha_{21})(\mu + \xi_v)(\mu + \xi_v + \alpha_{12} + \alpha_{21})},$$

$$S_{2u}^* = \frac{\Pi\alpha_{12}}{(\xi_v + \mu)(\xi_v + \alpha_{12} + \alpha_{21} + \mu)}, \quad S_{2v}^* = \frac{\Pi\xi_v\alpha_{12}(2\mu + \alpha_{12} + \alpha_{21} + \xi_v)}{\mu(\mu + \alpha_{12} + \alpha_{21})(\mu + \xi_v)(\mu + \xi_v + \alpha_{12} + \alpha_{21})}.$$

204 The local asymptotic stability property of the DFE ( $\mathbb{E}_0$ ) can be explored using the *next generation operator* method  
 205 [35, 36]. In particular, using the notation in [35], it follows that the associated non-negative matrix ( $F$ ) of new  
 206 infection terms, and the M-matrix ( $V$ ), of the linear transition terms in the infected compartments, are given,  
 207 respectively, by (where the entries  $f_i$  and  $g_i$ ,  $i = 1, \dots, 8$ , of the non-negative matrix  $F$ , are given in Appendix I):

$$F = \begin{bmatrix} 0 & f_1 & f_2 & f_3 & f_4 & 0 & f_5 & f_6 & f_7 & f_8 \\ 0 & 0 & 0 & 0 & 0 & 0 & 0 & 0 & 0 & 0 \\ 0 & 0 & 0 & 0 & 0 & 0 & 0 & 0 & 0 & 0 \\ 0 & 0 & 0 & 0 & 0 & 0 & 0 & 0 & 0 & 0 \\ 0 & 0 & 0 & 0 & 0 & 0 & 0 & 0 & 0 & 0 \\ 0 & g_1 & g_2 & g_3 & g_4 & 0 & g_5 & g_6 & g_7 & g_8 \\ 0 & 0 & 0 & 0 & 0 & 0 & 0 & 0 & 0 & 0 \\ 0 & 0 & 0 & 0 & 0 & 0 & 0 & 0 & 0 & 0 \\ 0 & 0 & 0 & 0 & 0 & 0 & 0 & 0 & 0 & 0 \\ 0 & 0 & 0 & 0 & 0 & 0 & 0 & 0 & 0 & 0 \end{bmatrix},$$

208 and,

$$V = \begin{bmatrix} K_1 & 0 & 0 & 0 & 0 & -\alpha_{21} & 0 & 0 & 0 & 0 \\ -\sigma_1 & K_2 & 0 & 0 & 0 & 0 & -\alpha_{21} & 0 & 0 & 0 \\ 0 & -r\sigma_p & K_3 & 0 & 0 & 0 & 0 & -\alpha_{21} & 0 & 0 \\ 0 & -(1-r)\sigma_p & 0 & K_4 & 0 & 0 & 0 & 0 & -\alpha_{21} & 0 \\ 0 & 0 & -\phi_{1I} & 0 & K_5 & 0 & 0 & 0 & 0 & -\alpha_{21} \\ -\alpha_{12} & 0 & 0 & 0 & 0 & K_6 & 0 & 0 & 0 & 0 \\ 0 & -\alpha_{12} & 0 & 0 & 0 & 0 & K_7 & 0 & 0 & 0 \\ 0 & 0 & -\alpha_{12} & 0 & 0 & 0 & -q\sigma_p & K_8 & 0 & 0 \\ 0 & 0 & 0 & -\alpha_{12} & 0 & 0 & -(1-q)\sigma_p & 0 & K_9 & 0 \\ 0 & 0 & 0 & 0 & -\alpha_{12} & 0 & 0 & -\phi_{2I} & 0 & K_{10} \end{bmatrix},$$

209 where  $K_1 = \alpha_{12} + \sigma_1 + \mu$ ,  $K_2 = \alpha_{12} + \sigma_p + \mu$ ,  $K_3 = \alpha_{12} + \phi_{1I} + \gamma_{1I} + \mu + \delta_{1I}$ ,  $K_4 = \alpha_{12} + \gamma_{1A} + \mu$ ,  $K_5 =$   
 210  $\alpha_{12} + \gamma_{1H} + \mu + \delta_{1H}$ ,  $K_6 = \alpha_{21} + \sigma_2 + \mu$ ,  $K_7 = \alpha_{21} + \sigma_p + \mu$ ,  $K_8 = \alpha_{21} + \phi_{2I} + \gamma_{2I} + \mu + \delta_{2I}$ ,  $K_9 =$   
 211  $\alpha_{21} + \gamma_{2A} + \mu$  and  $K_{10} = \alpha_{21} + \gamma_{2H} + \mu + \delta_{2H}$ .

212 The theoretical analysis will be carried out for the special case of the model  $\{(2.5), (2.6)\}$  in the absence of  
 213 the back-and-forth transitions between the no-mask and mask-user groups (i.e., the special case of the model with  
 214  $\alpha_{12} = \alpha_{21} = 0$ ). This is needed for mathematical tractability. It follows that the *control reproduction number* of  
 215 the model  $\{(2.5), (2.6)\}$  (with  $\alpha_{12} = \alpha_{21} = 0$ ), denoted by  $\mathcal{R}_c$ , is given by (where  $\rho$  is the spectral radius):

$$\mathcal{R}_c = \rho(FV^{-1}) = \frac{\sigma_1[S_{1u}^* + (1 - \varepsilon_v)S_{1v}^*][(\bar{K}_5[r\bar{K}_4\beta_{I_1} + (1 - r)\bar{K}_3\beta_{A_1}] + r\bar{K}_4\phi_{1I}\beta_{H_1})\sigma_p + \bar{K}_3\bar{K}_4\bar{K}_5\beta_{P_1}]}{N^* \prod_{i=1}^5 \bar{K}_i}, \quad (3.4)$$

216 where,  $\bar{K}_1 = \sigma_1 + \mu$ ,  $\bar{K}_2 = \sigma_P + \mu$ ,  $\bar{K}_3 = \phi_{1I} + \gamma_{1I} + \mu + \delta_{1I}$ ,  $\bar{K}_4 = \gamma_{1A} + \mu$ ,  $\bar{K}_5 = \gamma_{1H} + \mu + \delta_{1H}$ . The result  
 217 below follows from Theorem 2 of [35].

218 **Theorem 3.2.** *The DFE ( $\mathbb{E}_0$ ) of the model  $\{(2.5), (2.6)\}$ , with  $\alpha_{12} = \alpha_{21} = 0$ , is locally-asymptotically stable if*  
 219  $\mathcal{R}_c < 1$ , *and unstable if  $\mathcal{R}_c > 1$ .*

220 The threshold quantity  $\mathcal{R}_c$  is the *control reproduction number* of the model  $\{(2.5), (2.6)\}$ . It measures the average  
 221 number of new COVID-19 cases generated by a typical infectious individual introduced into a population where  
 222 a certain fraction of the population is protected (*via* the use of interventions, such as face mask, social-distancing  
 223 and/or vaccination). The epidemiological implication of Theorem 3.2 is that a small influx of COVID-19 cases will  
 224 not generate an outbreak in the community if the control reproduction number ( $\mathcal{R}_c$ ) is brought to, and maintained  
 225 at a, value less than unity. In the absence of public health interventions (i.e., in the absence of vaccination, face  
 226 mask usage and social-distancing), the control reproduction number ( $\mathcal{R}_c$ ) reduces to the *basic reproduction number*  
 227 (denoted by  $\mathcal{R}_0$ ), given by

$$\mathcal{R}_0 = \mathcal{R}_c|_{\varepsilon_0=\varepsilon_i=\varepsilon_v=S_{1v}^*=S_{2v}^*=0} = \frac{\sigma_1((\bar{K}_5[r\bar{K}_4\beta_{I_1} + (1 - r)\bar{K}_3\beta_{A_1}] + r\bar{K}_4\phi_{1I}\beta_{H_1})\sigma_p + \bar{K}_3\bar{K}_4\bar{K}_5\beta_{P_1})}{\prod_{i=1}^5 \bar{K}_i} \quad (3.5)$$

## 228 3.2 Derivation of Vaccine-induced Herd Immunity Threshold

229 Herd immunity is a measure of the minimum percentage of the number of individuals in a community that is  
 230 susceptible to a disease that need to be protected (i.e., become immune) so that the disease can be eliminated from  
 231 the population. There are two main ways to achieve herd immunity, namely through acquisition of natural immunity  
 232 (following natural recovery from infection with the disease) or by vaccination. Vaccination is the safest and fastest  
 233 way to achieve herd immunity [37, 38]. For vaccine-preventable diseases, such as COVID-19, not every susceptible  
 234 member of the community can be vaccinated, for numerous reasons (such as individuals with certain underlying  
 235 medical conditions, infants, pregnant women, or those who opt out of being vaccinated for various reasons etc.) [9].  
 236 So, the question, in the context of vaccine-preventable diseases, is what is the minimum proportion of individuals  
 237 that can be vaccinated we need to vaccinate in order to achieve herd immunity (so that those individuals that cannot  
 238 be vaccinated will become protected owing to the community-wide herd-immunity). In this section, a condition for  
 239 achieving vaccine-derived herd immunity in the U.S. will be derived.

240 Let  $f_v = S_{1v}^*/N^*$ , with  $N^* = \Pi/\mu$ , be the proportion of susceptible individuals in Group 1 that have been  
 241 vaccinated at the disease-free equilibrium ( $\mathbb{E}_0$ ). Using this definition in Equation (3.4) gives:

$$\mathcal{R}_c = \frac{\sigma_1(1 - \varepsilon_v f_v)((\bar{K}_5[r\bar{K}_4\beta_{I_1} + (1 - r)\bar{K}_3\beta_{A_1}] + r\bar{K}_4\phi_{1I}\beta_{H_1})\sigma_p + \bar{K}_3\bar{K}_4\bar{K}_5\beta_{P_1})}{\prod_{i=1}^5 \bar{K}_i}. \quad (3.6)$$

242 Setting  $\mathcal{R}_c$ , in Equation (3.6), to unity and solving for  $f_v$  gives the herd immunity threshold (denoted by  $f_v^c$ ) in  
 243 terms of the basic reproduction number [9, 18]:

$$f_v^c = \frac{1}{\varepsilon_v} \left( 1 - \frac{1}{\mathcal{R}_0} \right) \quad (\text{for } \mathcal{R}_0 > 1). \quad (3.7)$$

It follows from (3.6) and (3.7) that  $\mathcal{R}_c < (>)1$  if  $f_v > (<)f_v^c$ . Further,  $\mathcal{R}_c = 1$  whenever  $f_v = f_v^c$ . This result is summarized below:

**Theorem 3.3.** *Consider the special case of the model {(2.5), (2.6)} with  $\alpha_{12} = \alpha_{21} = 0$ . Vaccine-induced herd immunity can be achieved in the U.S., using an imperfect anti-COVID vaccine, if  $f_v > f_v^c$  (i.e., if  $\mathcal{R}_c < 1$ ). If  $f_v < f_v^c$  (i.e., if  $\mathcal{R}_c > 1$ ), then the vaccination program will fail to eliminate the COVID-19 pandemic in the U.S.*

The epidemiological implication of Theorem 3.3 is that the use of an imperfect anti-COVID vaccine can lead to the elimination of the COVID-19 pandemic in the U.S. if the sufficient number of individuals residing in the U.S. is vaccinated, such that  $f_v > f_v^c$ . The Vaccination program will fail to eliminate the pandemic if the vaccine coverage level is below the aforementioned herd immunity threshold (i.e., if  $f_v < f_v^c$ ). Although vaccination, no matter the coverage level, is always useful (i.e., vaccination will always reduce the associated reproduction number,  $\mathcal{R}_c$ , thereby reducing disease burden, even if the program is unable to bring the reproduction number to a value less than unity), elimination can only be achieved if the herd immunity threshold is reached (i.e., disease elimination is only feasible if the associated reproduction number of the model is reduced to, and maintained at, a value less than unity). The pandemic will persist in the U.S. if  $\mathcal{R}_c > 1$ .

Figure 3(a) depicts the cumulative mortality of COVID-19 in the U.S. for various steady-state vaccination coverage levels ( $f_v$ ). This figure shows a decrease in cumulative mortality with increasing vaccination coverage. In particular, a marked decrease in cumulative mortality, in comparison to the baseline cumulative mortality (blue curve in Figure 3(a)), is recorded when herd immunity (i.e., when  $f_v > f_v^c$ ) is attained (green curve of Figure 3(a)). While a noticeable decrease in the cumulative mortality is also observed when the vaccine coverage equals the herd immunity threshold (gold curve of Figure 3(a)), the cumulative mortality dramatically increases (in comparison to the baseline, depicted by the blue curve of this figure) if the vaccine coverage is below the herd immunity threshold (magenta curve of Figure 3(a)).

The effect of vaccination coverage ( $f_v$ ) and efficacy ( $\varepsilon_v$ ) on the control reproduction number ( $\mathcal{R}_c$ ) is assessed by depicted a contour plot of  $\mathcal{R}_c$ , as a function of  $f_v$  and  $\varepsilon_v$ . The results obtained ( Figure 3(b)) shows that the values of the control reproduction number for the U.S., during the simulation period (October 12, 2020 to January 20, 2021), range from 0.4 to 2.2. Further, this figure shows that the control reproduction number decreases with increasing values of vaccination efficacy and coverage. For example, using the AstraZeneca vaccine (with efficacy  $\varepsilon_v = 0.7$ ), about 80% of the U.S. population needs to be successfully vaccinated (with the two AstraZeneca doses) in order to bring the control reproduction number to a value less than unity. In other words, this figure shows that herd immunity can be achieved using the AstraZeneca vaccine in the U.S. if at least 80% of the populace received the two doses of the AstraZeneca vaccine. Using either the Pfizer or Moderna vaccine (each with efficacy of about 95%), on the other hand, the control reproduction number can be brought to a value less than unity (i.e., achieve herd immunity) if at least 60% of the U.S. populace received the two doses of either vaccine. Thus, this figure shows that the prospect of achieving vaccine-derived herd immunity using any of the three vaccines currently-available in the market (AstraZeneca, Pfizer and Moderna) is promising if the coverage is moderately-high enough (with the prospect far more likely to be achieved using the Pfizer or Moderna vaccine, in comparison to using the AstraZeneca vaccine).

We also explored the potential impact of additional social-distancing on the minimum vaccination coverage needed to achieve herd immunity. It should, first of all, be stressed that, since our model was parametrized using the cumulative mortality data during the third wave of the pandemic in the U.S. (October 12, 2020 to January 21, 2021), the effects of other nonpharmaceutical interventions, such as face masks usage and social-distancing, are already embedded into the results/data. In other words, the data (or the parametrization of our model) already includes some baseline level of these interventions. Specifically, we assume that the cumulative mortality data includes a baseline level of social-distancing compliance in the population (which is, clearly, quite high compared to what it was during the early stages of the pandemic in the U.S.) We now ask the question as to whether or not

290 the minimum requirement for 80% and 60% coverage needed to achieve herd immunity, using the AstraZeneca  
 291 or Pfizer/Moderna vaccine, respectively, can be reduced if the baseline social-distancing compliance is increased.  
 292 In this study, we model social-distancing compliance by multiplying the effective contact rates ( $\beta_1$  and  $\beta_2$ ) with  
 293 the factor  $1 - c_s$ , where  $0 < c_s \leq 1$  is a measure of the additional social-distancing compliance (to the baseline  
 294 social-distancing compliance achieved during the beginning of our simulation period; that is, by October 12, 2020).

295 We simulated the model  $\{(2.5), (2.6)\}$  using various values of  $c_s$ , and the results obtained are tabulated in Table  
 296 5. This table shows that if an additional 5% of the U.S. population observe social-distancing in public (in addition to  
 297 the baseline social-distancing compliance achieved by October 12, 2020), the minimum vaccine coverages required  
 298 to achieve herd immunity using the AstraZeneca and Pfizer/Moderna vaccines reduce, respectively, to 77% and  
 299 56.4%. Furthermore, if the increase in baseline social-distancing compliance is 10%, the minimum coverage  
 300 needed to achieve herd immunity further reduce (but marginally) to 73% and 54%, respectively. However, when  
 301 the increase in baseline social-distancing compliance is 30%, herd immunity can be achieved using the AstraZeneca  
 302 vaccine by vaccinating only 53% of the U.S. population with this vaccine. For this scenario, only about 39% of the  
 303 U.S. population needs to be vaccinated to achieve herd immunity if either the Pfizer or Moderna vaccine is used.

304 Thus, this study shows that the prospect of achieving vaccine-derived herd immunity in the U.S. using any  
 305 of the three currently-available vaccines is greatly enhanced if the vaccination program is complemented with an  
 306 increased (and sustained) social-distancing strategy (from the baseline). In other words, if more people living  
 307 in the U.S. will continue to observe social-distancing (e.g., additional 30% from the baseline social-distancing  
 308 compliance), then COVID-19 elimination can be achieved if roughly only half the population is vaccinated using  
 309 the AstraZeneca vaccine, or 2 in 5 vaccinated if either the Pfizer or Moderna vaccine is used instead. The U.S. is  
 310 currently using the latter vaccines. Hence, with about 30% additional social-distancing compliance, we would only  
 311 need to vaccinate about 2 in 5 residents of the U.S. to achieve vaccine-derived herd immunity (hence, eliminate the  
 312 pandemic).

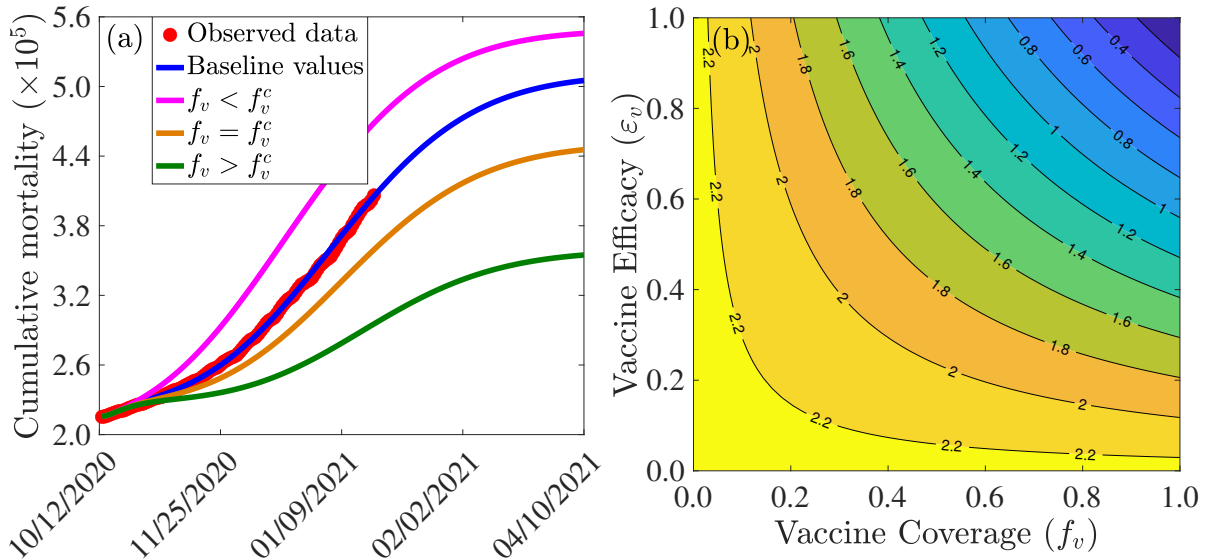

Figure 3: Assessment of the effects of vaccine coverage ( $f_v$ ) and efficacy ( $\epsilon_v$ ) on COVID-19 dynamics in the U.S. (a) Simulations of the model  $\{(2.5), (2.6)\}$ , with  $\alpha_{12} = \alpha_{21} = 0$ , showing the cumulative COVID-19 mortality in the U.S., as a function of time, for various values of vaccine coverage. Parameter values used are as given by the baseline values in Tables 3-4, with  $\alpha_{12} = \alpha_{21} = 0$  and various values of  $f_v$ . Magenta curve ( $f_v = 0.3021 < 0.5900 = f_v^c$ ), blue curve (baseline parameter values, and baseline level of social-distancing compliance inherent in the cumulative mortality data, for the period October 12, 2020 to January 20, 2021, used to fit the model), gold curve ( $f_v = 0.5900 = f_v^c$ ) and green curve ( $f_v = 0.9216 > 0.5900 = f_v^c$ ). The observed cumulative deaths data, fitted to the baseline scenario predicted by the model (blue curve), is shown in red dots. (b) Contour plot of the control reproduction number ( $\mathcal{R}_c$ ) of the model  $\{(2.5), (2.6)\}$ , with  $\alpha_{12} = \alpha_{21} = 0$ , as a function of vaccine coverage ( $f_v$ ) and vaccine efficacy ( $\epsilon_v$ ). Parameter values used are as given in Tables 3-4, with  $\alpha_{12} = \alpha_{21} = 0$ .

Table 5: Vaccine-induced herd immunity threshold ( $f_v^c$ ) for the U.S. for various levels of increases in baseline social-distancing compliance ( $c_s$ ). Parameter values used are as given in Tables 3-4, with  $\alpha_{12} = \alpha_{21} = 0$ .

|                                             | Herd threshold       | Herd threshold   | Herd threshold | Herd threshold |
|---------------------------------------------|----------------------|------------------|----------------|----------------|
| <b>Vaccine name (efficacy)</b>              | $c_s = 0$ (baseline) | $c_s = 5\%$      | $c_s = 10\%$   | $c_s = 30\%$   |
| AstraZeneca ( $\varepsilon_v = 70\%$ )      | $f_v^c = 80\%$       | $f_v^c = 77\%$   | $f_v^c = 73\%$ | $f_v^c = 53\%$ |
| Pfizer & Moderna ( $\varepsilon_v = 95\%$ ) | $f_v^c = 59\%$       | $f_v^c = 56.4\%$ | $f_v^c = 54\%$ | $f_v^c = 39\%$ |

## 4 Numerical Simulations: Assessment of Control Strategies

The model  $\{(2.5), (2.6)\}$  will now be simulated to assess the population-level impact of the various intervention strategies described in this study. In particular, our objective is to assess the impact of social-distancing and face mask usage, implemented as sole interventions and in combination with any of the three currently-available anti-COVID vaccines (namely the AstraZeneca, Moderna and Pfizer vaccines), on curtailing (or eliminating) the burden of the COVID-19 pandemic in the United States. Unless otherwise stated, the simulations will be carried out using the estimated (fitted) and fixed baseline values of the parameters of the model tabulated in Tables 3-4. Furthermore, unless otherwise stated, the baseline initial size of the population of individuals who habitually wear face masks in public (assumed to be 30%), denoted by  $N_2(0)$ , will be used in the simulations. The numerical simulation results for the baseline scenario (i.e., where baseline values of the parameters of the model, as well as the baseline initial size of the mask-wearing population, are used) will be illustrated in blue curves in the forthcoming figures. Furthermore, all numerical simulations will be carried out for the period starting from October 12, 2020 (which corresponds to the onset of the third wave of the pandemic in the United States).

### 4.1 Assessing the Impact of Initial Population of Face Mask Wearers

The model (2.5)-(2.6) is simulated to assess the community-wide impact of using face masks, as the sole intervention, in curtailing the spread of the pandemic in the United States. Specifically, we simulate the model using the baseline values of the parameters in Tables 3-4 and various values of the initial size of the population of individuals who habitually wear face masks in public since the beginning of the pandemic in the United States (denoted by  $N_2(0)$ ). It should be noted that the parameters associated with other interventions (e.g., vaccination-related and social-distancing-related parameters) are kept at their baseline values given in Tables 3-4. Although a sizable number of U.S. residents (notably individuals categorized in the first-tier priority group for receiving the COVID-19 vaccine, such as frontline healthcare workers, individuals at residential care facilities, the elderly etc.) have already been vaccinated using one of the two FDA-approved vaccines (20.54 million vaccines doses have already been administered in the U.S. as of January 23, 2021 [39]), these vaccines are not expected to be widely available to the general public until some time in March or April, 2021. Consequently, we set March 15, 2021 as our reference point for when we expect the vaccines to be widely available to the general public. Under this scenario (of vaccines expected to be widely available a few months after the initial starting point of our simulations, namely October 12, 2020), the objective of this set of simulations is to assess the impact of face masks usage, as a sole intervention, in controlling the spread of the pandemic in the U.S. before the two FDA-approved vaccines (Pfizer or Moderna) become widely available to the general U.S. public (to the extent that high vaccination coverage, such as vaccinating one million U.S. residents *per* day, can be realistically achieved). The new U.S. administration aims to vaccinate 100 million residents during its first 100 days.

The simulation results obtained, depicted in Figure 4, show (generally) that the early adoption of face masks control measures (as measured in terms of the initial proportion of the populace who choose to habitually wear face masks whenever they are out in the public, denoted by  $N_2(0)$ ) play a vital role in curtailing the COVID-19 mortality in the U.S., particularly for the case when mask-wearers do not abandon their masks-wearing habit (i.e.,  $\alpha_{21} = 0$ ). For the case where the parameters associated with the back-and-forth transitions between the masking and non-masking sub-populations (i.e.,  $\alpha_{12}$  and  $\alpha_{21}$ ) are maintained at their baseline values (given in Tables 3-4), this figure shows that the size of the initial proportion of individuals who wear face masks has a significant impact

352 on the cumulative COVID-19 mortality, as measured in relation to the cumulative mortality recorded when the  
353 initial proportion of mask wearers is at baseline level (blue curves in Figure 4). In particular, a 34% reduction in  
354 the cumulative mortality, in comparison to the cumulative mortality for the baseline scenario, will be recorded by  
355 March 15, 2021, if the initial proportion of mask-wearers is 40% (Figure 4 (a), magenta curve). Furthermore, the  
356 reduction in cumulative mortality by March 15, 2021 increases to 52% if the initial proportion of mask-wearers is  
357 75% (Figure 4 (a), green curve). On the other hand, for the case when mask-wearers remain mask-wearers since  
358 the beginning of the simulation period (i.e., since October 12, 2020), so that  $\alpha_{21} = 0$ , while non-mask wearers (i.e.,  
359 those in Group 1) can change their behavior and become mask-wearers (i.e.,  $\alpha_{12} \neq 0$ ), our simulations show that  
360 the initial proportion of individuals who adopt masking only marginally affects the cumulative mortality (Figure  
361 4 (b)), in relation to the scenario in Figure 4 (a), where both  $\alpha_{12}$  and  $\alpha_{21}$  are nonzero). In particular, if 40%  
362 of the U.S. population adopted mask-wearing right from the aforementioned October 12, 2020, up to 37% of the  
363 baseline COVID-19 mortality can be averted (Figure 4 (b), magenta curve), in comparison to the baseline (Figure  
364 4 (b), blue curve). Furthermore, the reduction in baseline cumulative mortality rises to 53% if three in every four  
365 Americans opted to wear face masks since the beginning of the simulation period (Figure 4 (b), green curve). This  
366 also represents a marginal increase in the cumulative deaths averted, in comparison to the scenario when  $\alpha_{12} \neq 0$   
367 and  $\alpha_{21} \neq 0$  (Figure 4 (a), green curve).

368 For the case when no back-and-forth transitions between the two (mask-wearing and non-mask-wearing) groups  
369 is allowed (i.e., when  $\alpha_{12} = \alpha_{21} = 0$ ), our simulations show a far more dramatic effect of face mask usage on  
370 COVID-19 mortality (Figure 4 (c)). For instance, this figure shows that higher cumulative mortality is recorded,  
371 in comparison to the baseline masks use scenario, when the initial size of the population of mask wearers is 40%  
372 (Figure 4 (c), magenta curve), in comparison to the blue curve of the same figure). Specifically, this represents  
373 a 55% increase, in comparison to the baseline cumulative mortality. This simulation result suggests that the 40%  
374 initial size of the populace wearing face masks, during the onset of the third wave of the pandemic in the U.S.  
375 (starting October 12, 2020), falls below the mask-use compliance threshold level needed to reduce the cumulative  
376 mortality during the third wave. On the other hand, if the initial size of the population of face masks wearers  
377 is increased to 50%, a decrease (and not an increase) in cumulative mortality is recorded, in comparison to the  
378 cumulative mortality for the baseline scenario (Figure 4 (c), gold curve, in comparison to the blue curve of the same  
379 figure). Further dramatic reduction (52%), in relation to the baseline scenario, will be achieved if the initial size of  
380 the mask-wearing population is increased to 75% (Figure 4 (c), green curve, in comparison to the blue curve of the  
381 same figure). Thus, these simulations show that, for the case when no change of mask-wearing behavior is allowed  
382 (i.e., everyone remains in their original group), there is a threshold value of the initial size of the population of mask  
383 wearers above (below) which the cumulative mortality is decreased (increased). Specifically, this simulation shows  
384 that (for this scenario with  $\alpha_{12} = \alpha_{21} = 0$ ), at least half the population need to be wearing face masks right from  
385 the beginning of the epidemic to ensure greater reduction in cumulative mortality, in comparison to the baseline  
386 scenario (when the initial size of the mask-wearing sub-population is 30%).

387 In summary, comparing the same initial mask coverage (i.e., the same curve colors) in Figures 4 (a)-(c), it  
388 is clear that the scenario where individuals are allowed to change their behaviors from not wearing face masks to  
389 wearing face masks (i.e.,  $\alpha_{12} \neq 0$ ), but masks wearers do not abandon masks wearing (i.e.,  $\alpha_{21} = 0$ ), depicted in  
390 Figure 4 (b), resulted in saving more lives (*albeit* only slightly), compared to the scenarios where no change of  
391 behavior is allowed for members of each group (Figure 4 (c)) or members of both groups can change their behavior  
392 (Figure 4 (a)). In other words, our study emphasize the need for non-maskers to adopt a mask-wearing culture (i.e.,  
393  $\alpha_{12} = 0$ ) and habitually masks wearers do not abandon their mask-wearing habit (i.e.,  $\alpha_{21} = 0$ ).

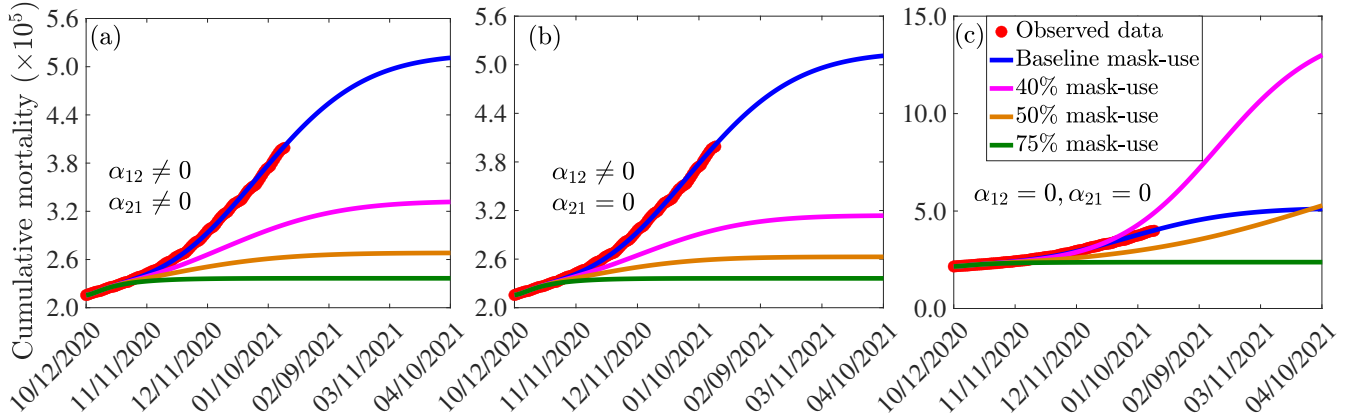

Figure 4: Assessment of the impact of face mask usage, as a sole intervention, on COVID-19 pandemic in the U.S. Simulations of the model (2.5)-(2.6), showing cumulative mortality, as a function of time, for (a) face mask transition parameters ( $\alpha_{12}$  and  $\alpha_{21}$ ) maintained at their baseline values, (b) mask-wearers strictly adhere to wearing masks ( $\alpha_{21} = 0$ ) and non-mask-wearers transit to mask wearing at their baseline rate ( $\alpha_{12} \neq 0$ ), and (c) non-mask wearers and mask-wearers do not change their behavior (i.e.,  $\alpha_{12} = \alpha_{21} = 0$ ). Mask use change is implemented in terms of changes in the initial size of the population of individuals who wear face masks (from the onset of simulations, on October 12, 2020). Blue curves (in each of the plots) represent the baseline scenarios where the initial size of the population of mask wearers is fixed at 30%, and the transition parameters,  $\alpha_{12}$  and  $\alpha_{21}$ , are maintained at their baseline values. Parameter values used in the simulations are as given by the baseline values in Tables 3-4, with different values of  $\alpha_{12}$  and  $\alpha_{21}$  (except for the blue curves, where  $\alpha_{12}$  and  $\alpha_{21}$  are fixed at their baseline values).

## 394 4.2 Assessing the Impact of Additional Social-distancing Compliance

395 In this section, we carry out numerical simulations to assess the potential impact of increases in the baseline  
 396 social-distancing compliance ( $c_s$ ) on the control of the pandemic. Specifically, the model  $\{(2.5), (2.6)\}$  will be  
 397 simulated using the baseline parameter values tabulated in Tables 3-4 with various values of  $c_s$  (corresponding to  
 398 the various levels of the increase in baseline social-distancing compliance in the U.S., starting from October 12,  
 399 2020). It should be noted that, for these simulations, the baseline initial size of the masking population,  $N_2(0)$ , is  
 400 maintained. Furthermore, vaccine-related parameter values are maintained at their baseline levels in Tables 3-4.

401 The simulation results obtained, depicted in Figure 5, show that, in the absence of additional increase in  
 402 baseline social-distancing (i.e.,  $c_s = 0$ , so that social-distancing compliance is maintained at the baseline level  
 403 inherent in the cumulative mortality data by October 12, 2020), the U.S. would record about 500,000 cumulative  
 404 deaths by March 15, 2021 (Figure 5 (a), blue curve). For this (baseline social-distancing) scenario, the U.S. would  
 405 have recorded a peak daily mortality of about 3,000 deaths on January 5, 2021 (Figure 5 (b), blue curve). The  
 406 simulations in Figure 5 further show that the cumulative mortality (Figure 5 (a)) and daily mortality (Figure 5 (b))  
 407 decrease with increasing levels of the additional social-distancing compliance ( $c_s$ ) in the population. For example,  
 408 if the baseline social-distancing achieved during the onset of the third wave of the pandemic in the U.S. is further  
 409 increased by only 5%, the simulation results show that up to a 19% of the cumulative mortality can be averted by  
 410 March 15, 2021 (Figure 5 (a), magenta curve), in comparison to the baseline social-distancing scenario (Figure 5  
 411 (a), blue curve). Similarly, for this 5% increase in social-distancing (in relation to the baseline), up to 36% reduction  
 412 in daily mortality can be achieved (Figure 5 (b), magenta curve), in comparison to the baseline scenario (Figure 5  
 413 (b), blue curve), and the pandemic would have peaked a week earlier (in late December 2020; the daily mortality  
 414 at this peak would have been 1,900), in comparison to the peak recorded in the baseline social-distancing scenario  
 415 ((Figure 5 (b), blue curve). More dramatic reduction in mortality will be recorded if the level of additional social-  
 416 distancing compliance is further increased. For instance, if the baseline social-distancing compliance is increased  
 417 by 10%, our simulations show that about 31% of the cumulative deaths recorded for the case with baseline social-  
 418 distancing scenario ((Figure 5 (a), blue curve) would have been averted (Figure 5 (a), gold curve). For this



419 scenario, up to 59% of the daily deaths would have been prevented and the pandemic would have peaked in mid  
 420 December 2020 (the daily mortality at this peak would have been 1, 229), as depicted in the gold curve of Figure  
 421 5 (b). Finally, if the baseline social-distancing compliance is increased by 30%, the pandemic would have failed to  
 422 generate a major outbreak in the U.S. (Figure 5, green curves). In particular, the cumulative mortality for the U.S.  
 423 by March 15, 2021 will be about 252, 400 (as against the nearly 400,000 fatalities that were recorded), as shown  
 424 by the green curve of Figure 5 (a), in comparison to the blue curve of the same figure.

425 In summary, the results in Figure 5 show that COVID-19 could have been effectively suppressed in the U.S.  
 426 if the baseline social-distancing compliance (recorded during the onset of the third wave of the pandemic in early  
 427 October 2020) is increased by about 10% to 30%. These (recommended) increases in social-distancing compliance  
 428 seem reasonably attainable. Hence, our study suggests that a moderate increase in the baseline social-distancing  
 429 compliance will lead to the effective control of the COVID-19 pandemic in the U.S. This (increase in baseline  
 430 social-distancing, as well as face masks usage) should be sustained until herd immunity is attained.

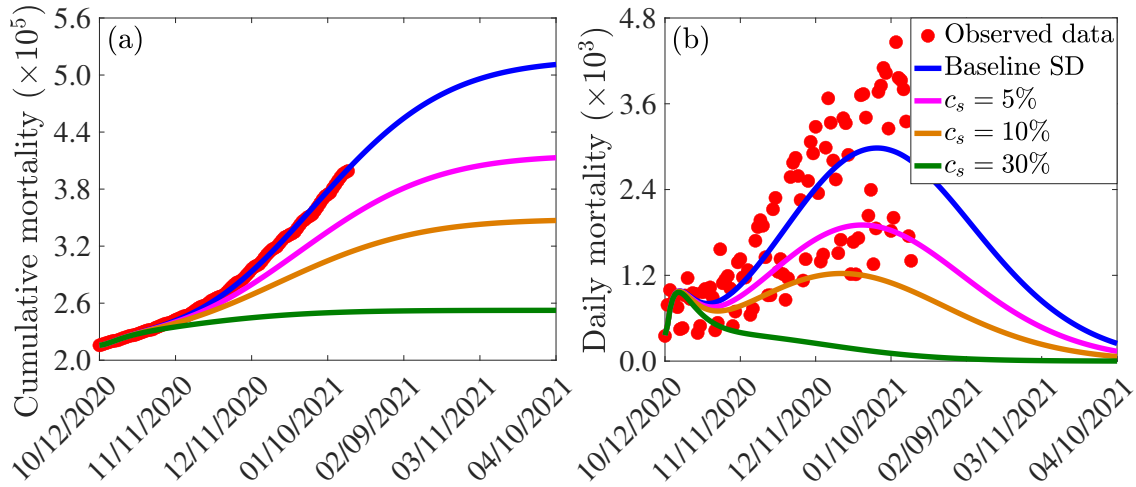

Figure 5: Assessment of the singular impact of increases in baseline social-distancing compliance on COVID-19 pandemic in the U.S. Simulations of the model (2.5)-(2.6) showing (a) cumulative mortality, as a function of time; (b) daily mortality, as a function of time, for various levels of increases in baseline social-distancing (SD) compliance ( $c_s$ ) attained during the third wave of the pandemic in the United States. Parameter values used in the simulations are as given by the baseline values in Tables 3-4, with  $\beta_1$  and  $\beta_2$  multiplied by  $(1 - c_s)$ .

### 431 4.3 Assessment of Combined Impact of Vaccination and Social-distancing

432 The model (2.5)-(2.6) will now be simulated to assess the community-wide impact of the combined vaccination  
 433 and social-distancing strategy. Although the two FDA-approved vaccines were approved for use by mid December  
 434 2020, we assume a hypothetical situation in which the vaccination started by mid October 2020 (the reason is to  
 435 ensure consistency with the cumulative mortality data we used, which started from October 12, 2020 corresponding  
 436 to the onset of the third wave of the pandemic in the United States). We consider the three vaccines currently being  
 437 used in humans, namely the AstraZeneca vaccine (with estimated efficacy of 70%) and the two FDA-approved  
 438 vaccines (Moderna and Pfizer vaccines, each with estimated efficacy of about 95%). Simulations are carried out  
 439 using the baseline parameter values in Tables 3-4, with various values of the vaccination coverage parameter ( $\xi_v$ ).  
 440 For these simulations, parameters and initial conditions related to the other intervention (face mask usage) are  
 441 maintained at their baseline values. Since the Moderna and Pfizer vaccines have essentially the same estimated  
 442 efficacy ( $\approx 95\%$ ), we group them together in the numerical simulations for this section.

443 The simulation results obtained for the Moderna and Pfizer vaccine, depicted in Figures 6 (a)-(c), show that,  
 444 in the absence of vaccination (and with social-distancing at baseline compliance level), approximately 511, 100  
 445 cumulative deaths will be recorded in the U.S. by April 10, 2021 (blue curves of Figures 6 (a)-(c)). Furthermore,  
 446 this figure shows a marked reduction in daily mortality with increasing vaccination coverage ( $\xi_v$ ). This reduction

447 further increases if vaccination is combined with social-distancing. For instance, with social-distancing compliance  
 448 maintained at its baseline value on October 12, 2020 (i.e.,  $c_s = 0$ ), vaccinating at a rate of  $0.00074$  *per* day (which  
 449 roughly translates to vaccinating 250,000 people every day) resulted in a reduction of the projected cumulative  
 450 mortality recorded by April 10, 2021 by 12%, in comparison to the case when no vaccination is used (magenta  
 451 curve in Figure 6 (a), in comparison to the blue curve of the same figure). In fact, up to 31% of the projected  
 452 cumulative mortality to be recorded by April 10, 2021 could be averted if, for this vaccination rate, the baseline  
 453 social-distancing compliance is increased by 10% (i.e.,  $c_s = 0.1$ ; magenta curve in Figure 6 (c), in comparison  
 454 to magenta curve in Figure 6(a)). If the vaccination rate is further increased to, for instance,  $\xi_v = 0.0015$  *per*  
 455 day (corresponding to vaccinating about 500,000 people every day), while keeping social-distancing at its baseline  
 456 compliance level (i.e.,  $c_s = 0$ ), our simulations show a reduction of 27% in the projected cumulative mortality by  
 457 April 10, 2021, in comparison to the baseline social-distancing scenario (gold curve, Figure 6 (a), in comparison to  
 458 the blue curve of the same figure). This reduction increases to 38% if the vaccination program is supplemented with  
 459 social-distancing that increases the baseline compliance by 10% (gold curve, Figures 6 (c)). If 1 million people  
 460 are vaccinated *per* day (i.e.,  $\xi_v = 0.003$  *per* day), our simulations show that the use of the Moderna and Pfizer  
 461 vaccines could lead to up to 36% reduction in the projected cumulative mortality by April 10, 2021 in the U.S. if  
 462 the vaccination program is combined with a 10% increase in social-distancing compliance level (green curve of  
 463 Figure 6 (c)). Finally, compared to the Moderna and Pfizer vaccines, slightly lower reductions in the projected  
 464 cumulative mortality are recorded when the AstraZeneca vaccine (with moderate to high vaccination coverage) is  
 465 used (Figures 6 (d)-(f)), particularly if combined with social-distancing. These results are summarized in Table 6.

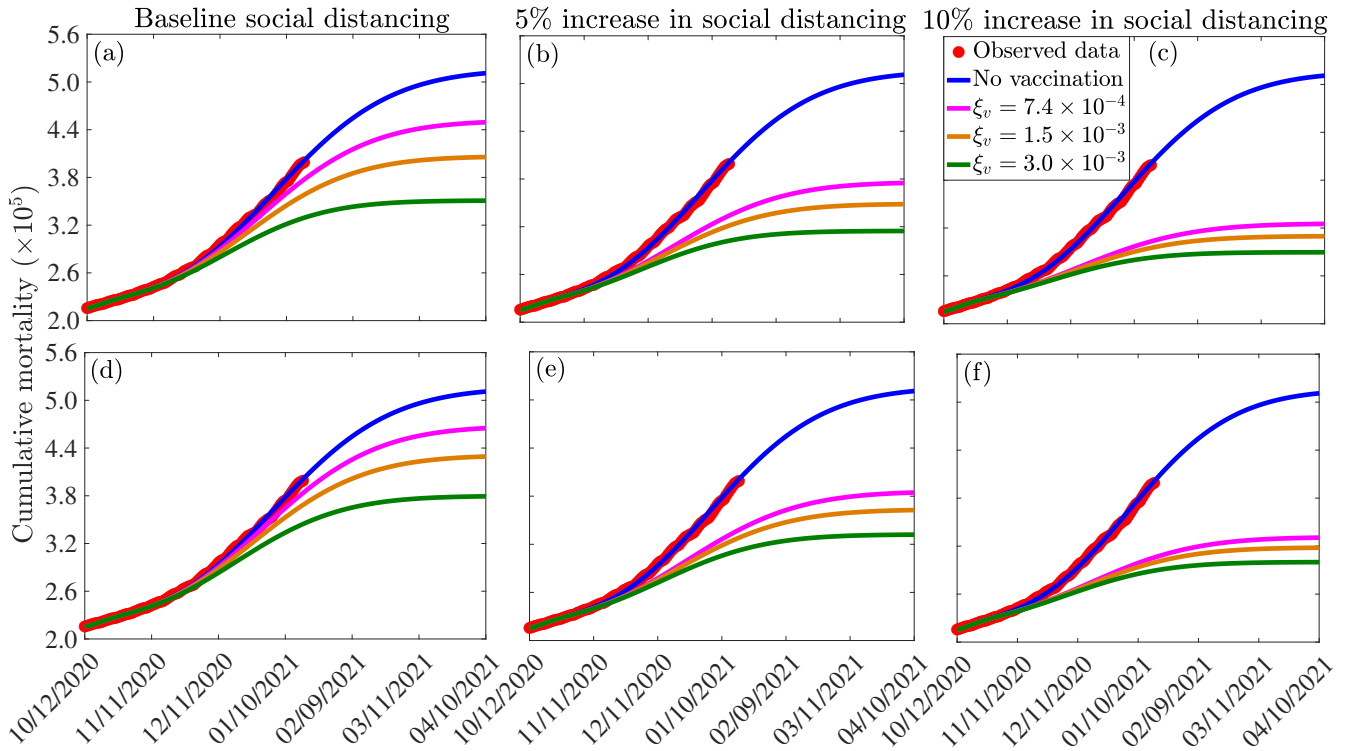

Figure 6: Assessment of the combined impact of vaccination and social-distancing on cumulative mortality. Simulations of the model (2.5)-(2.6), depicting cumulative as a function of time, for the currently available anti-COVID-19 vaccines and various levels of increases in baseline social-distancing compliance starting from October 12, 2020 ( $c_s$ ). (a)-(c): Pfizer or Moderna vaccine. (d)-(f): AstraZeneca vaccine. The vaccination rates  $\xi_v = 7.4 \times 10^{-4}$ ,  $1.5 \times 10^{-3}$  *per* day, and  $3.0 \times 10^{-3}$  *per* day correspond, respectively, to vaccinating approximately  $2.5 \times 10^5$ ,  $5.0 \times 10^5$  and  $1.0 \times 10^6$  people *per* day. Other parameter values of the model used are as presented in Tables 3-4.

Table 6: Percentage reduction in projected cumulative COVID-19 mortality on April 10, 2021, in relation to the cumulative mortality in the absence of vaccination (511, 100 COVID-19 deaths on April 10, 2021), for the three currently-available anti-COVID-19 vaccines: AstraZeneca vaccine (efficacy  $\varepsilon_v = 0.7$ ); Pfizer and/or Moderna vaccine (efficacy  $\varepsilon_v = 0.95$ ), and various levels of increases in baseline social-distancing compliance attained on October 12, 2020 ( $c_s$ ) and vaccination rate ( $\xi_v$ ). Notation: SD represents social-distancing compliance.

| Number of people vaccinated <i>per day</i> | Reduction with Baseline SD ( $c_s = 0$ ) |                        | Reduction with $c_s = 0.05$ |                        | Reduction with $c_s = 0.10$ |                        |
|--------------------------------------------|------------------------------------------|------------------------|-----------------------------|------------------------|-----------------------------|------------------------|
|                                            | $\varepsilon_v = 70\%$                   | $\varepsilon_v = 95\%$ | $\varepsilon_v = 70\%$      | $\varepsilon_v = 95\%$ | $\varepsilon_v = 70\%$      | $\varepsilon_v = 95\%$ |
| 250,000                                    | 9%                                       | 12%                    | 25%                         | 27%                    | 35%                         | 36%                    |
| 500,000                                    | 16%                                      | 20%                    | 29%                         | 32%                    | 38%                         | 39%                    |
| 1,000,000                                  | 26%                                      | 31%                    | 35%                         | 38%                    | 41%                         | 43%                    |

#### 4.4 Combined Impact of Vaccination and Social-distancing on Time-to-elimination

The model (2.5)-(2.6) will now be simulated to assess the population-level impact of the combined vaccination and social-distancing interventions on the expected time the pandemic might be eliminated in the U.S. if the two strategies are implemented together. Mathematically, we define “elimination” to mean when the number of daily new cases is identically zero. As in Section 4.3, we consider the three currently-available vaccines (AstraZeneca, Moderna and the Pfizer vaccines), and assume that the vaccination program was started on October 12, 2020. The model is simulated to generate a time series of new daily COVID-19 cases in the U.S., for various vaccination rate ( $\xi_v$ ) and levels of increases in baseline social-distancing compliance ( $c_s$ ).

The results obtained, for each of the three currently-available vaccines, are depicted in Figures 7. This figure shows a marked decrease in disease burden (measured in terms of the number of new daily cases), with the possibility of elimination of the pandemic within 8 – 10 months from the commencement of the vaccination program. In particular, these simulations show that vaccinating 250, 000 people *per day*, with the Moderna or the Pfizer vaccine, will result in COVID-19 elimination in the U.S. by mid August of 2021, if the social-distancing compliance is kept at its current baseline compliance level (blue curve of Figure 7 (a)). For this scenario, the elimination will be reached in late August 2021 using the AstraZeneca vaccine. If the vaccination rate is further increased, such as to vaccinating 1 million people every day (and keeping social-distancing at its October 12, 2020 baseline), COVID-19 elimination is achieved much sooner in the United States. For instance, for this scenario (i.e., with  $\xi_v = 0.003$  *per day*), the pandemic can be eliminated by late June of 2021 using the Moderna or the Pfizer vaccines (green curve of Figure 7 (a)) and by mid July of 2021 using the AstraZeneca vaccine (blue curve of Figure 7 (d)).

Our simulations further show that if the vaccination program is combined with social-distancing that increases the baseline compliance by 10%, COVID-19 can be eliminated in the U.S. by as early as the end of May of 2021 using the Moderna or the Pfizer vaccine (green curve of Figure 7 (c)), and by late June of 2021 using the AstraZeneca vaccine (green curve, Figure 7 (f)). In conclusion, these simulations show that any of the three currently-available vaccines considered in this study will lead to the elimination of the pandemic in the U.S. if the vaccination rate is moderately-high enough. The time-to-elimination depends on the vaccination rate and the level of increases in the baseline social-distancing compliance attained by October 12, 2020. The pandemic can be eliminated as early as the end of May of 2021 if moderate to high vaccination rate (e.g., 1 million people are vaccinated *per day*) and social-distancing compliance (e.g.,  $c_s = 0.1$ ) is attained and maintained.

It is worth mentioning that the two vaccines that are currently in used in the U.S. were only approved by the FDA in December 2020 (the Pfizer vaccine was approved on December 11, 2020, while the Moderna vaccine was approved a week later), and their administration into the arms of Americans started late in December 2020. Therefore, as we noted earlier, the greater U.S. community might only be able to receive any of the vaccines by March or April 2021 (we chose March 15, 2021 as our reference point for simulation/comparative purposes). Thus, with a mass vaccination start date of mid March 2021 (i.e., if we can only achieve vaccinating 1 million or more people daily from mid March 2021), then COVID-19 elimination, assuming a 10% increase in baseline social-distancing compliance achieved on October 12, 2020, can be achieved by the end of October 2021 using

502 the Moderna or the Pfizer vaccine (for the AstraZeneca vaccine, elimination will extend to November of 2021).  
 503 It should be mentioned that the elimination can be achieved even earlier if large scale community vaccination in  
 504 the U.S. is started earlier than our projected March 15, 2021, and particularly if this (early large scale vaccination  
 505 before March 15, 2021) is also complemented with significant increase in baseline social-distancing compliance  
 506 (such as increasing the baseline compliance by 10%).

507 In summary, our study clearly shows that the prospect of eliminating COVID-19 in the U.S. by the middle  
 508 or early fall of 2021 is very much feasible if moderate level of coverage can be achieved using either of the two  
 509 vaccines being used in the U.S., and if this vaccination coverage is complemented with a social-distancing strategy  
 510 that increases the baseline compliance achieved by October 12, 2020 by a mere 10%. Our study certainly points to  
 511 the fact that we will be seeing the back of this devastating Coronavirus beast, and socio-economic life may return  
 512 to near normalcy, in 2021.

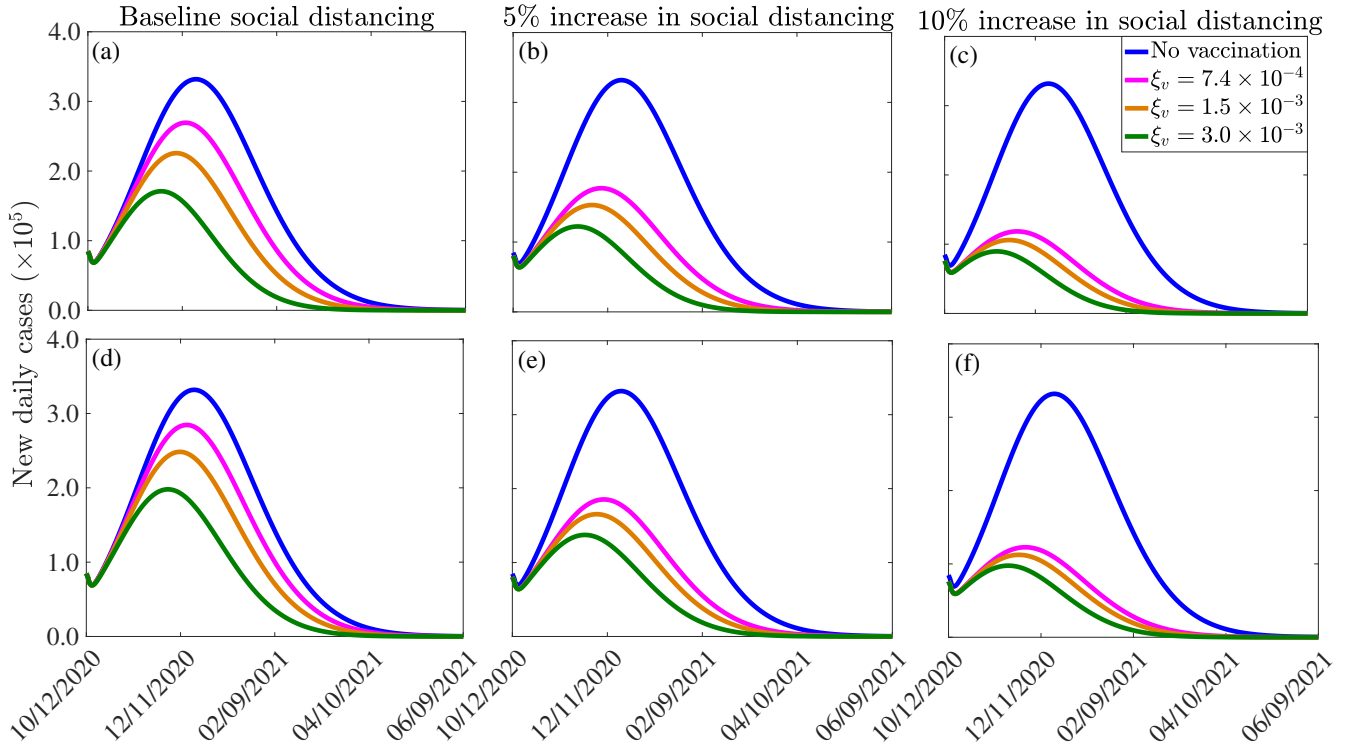

Figure 7: Effect of vaccination and social-distancing on time-to-elimination. Simulations of the model (2.5)-(2.6), depicting the impact of three currently-available vaccines against COVID-19 (the AstraZeneca vaccine, and the Pfizer or Moderna vaccine) and social-distancing, on time-to-elimination of the pandemic in the U.S. (a)-(c): Moderna or Pfizer vaccines. (d)-(f): AstraZeneca vaccine. The social-distancing compliance is baseline for (a) and (d),  $c_s = 0.05$  for (b) and (e), and  $c_s = 0.10$  for (e) and (f). The vaccination rates  $\xi_v = 7.4 \times 10^{-4}$ ,  $1.5 \times 10^{-3}$ ,  $3.0 \times 10^{-3}$  per day correspond, respectively, to vaccinating approximately  $2.5 \times 10^5$ ,  $5.0 \times 10^5$ ,  $1.0 \times 10^6$  people per day. The values of the other parameters of the model used in the simulation are as given in Tables 3-4.

#### 513 4.5 Assessing the impacts of waning immunity, mask fatigue and relaxation of mask mandate for 514 fully-vaccinated individuals, and therapeutic benefits of vaccines

515 In this section, the multi-group model (2.5)-(2.6) will be adapted and simulated to assess the population-level impact  
 516 of three other factors that may significantly affect the effectiveness of the vaccination program against COVID-19,  
 517 namely (a) waning natural and vaccine-derived immunity [40–42], (b) mask fatigue (and giving up masking) by  
 518 fully-vaccinated individuals [43] and (c) therapeutic benefits of the vaccines (such as reducing development of  
 519 severe disease, hospitalization and mortality in breakthrough infections, as well as in reducing transmissibility of  
 520 infected vaccinated individuals) [15, 16, 44]. Although the model (2.5)-(2.6) does not explicitly incorporate the

521 aforementioned factors, it can readily be adapted to allow for their assessment. We describe below how the model  
522 can be adapted to achieve this objective, in addition to illustrating the effects of the factors *via* numerical simulations  
523 of the resulting adapted version of the model (2.5)-(2.6). For consistency, the simulations in this section will also  
524 be carried out from the beginning of the third pandemic wave in the US (i.e., from October 12, 2020).

#### 525 4.5.1 Waning natural and vaccine-derived immunity

526 Waning natural immunity can be incorporated in the model by allowing a transition from the compartment of  
527 recovered individuals (for each of the two groups) into the corresponding compartment for unvaccinated susceptible  
528 individuals (i.e., the immunity derived from natural recovery from COVID-19 infection ultimately wanes, and the  
529 recovered individuals subsequently become wholly-susceptible again). To adapt the model to account for this,  
530 we introduce a new parameter,  $\omega_r$ , to represent the *per capita* rate at which recovered individuals revert to the  
531 corresponding unvaccinated susceptible compartment (i.e., the quantity  $\omega_r R_i$ , with  $i = 1, 2$ ) is subtracted from the  
532 equation for  $R_i$  and added to the corresponding equation for  $S_{iu}$  in the model (2.5)-(2.6).

533 Similarly, vaccine-derived waning immunity can be incorporated into the model (2.5)-(2.6) by allowing for trans-  
534 sitions from the vaccinated susceptible compartments ( $S_{iv}$ ;  $i = 1, 2$ ) to the corresponding unvaccinated susceptible  
535 compartment ( $S_{iu}$ ;  $i = 1, 2$ ). We introduce a new parameter,  $\omega_v$ , to represent the rate of waning of vaccine-derived  
536 immunity. To incorporate this into the model, the quantity  $\omega_v S_{iv}$  ( $i = 1, 2$ ) is subtracted from the equation for  $S_{iv}$   
537 and added to the corresponding equation for  $S_{iu}$  in the model (2.5)-(2.6). For simulation purposes, we set  $\omega_r$  and  
538  $\omega_v$  to be 1/270 *per day* and 1/180 *per day* [40, 42], respectively (corresponding to a nine and six months duration  
539 for the waning of natural and vaccine-derived immunity, respectively).

540 The model (2.5)-(2.6) is now simulated, using the parameter values in Tables 3 and 4, together with the above  
541 modifications (accounting for waning natural and vaccine-derived immunity, using the estimated values of  $\omega_r$  and  
542  $\omega_v$ ), to assess the potential impact of waning immunity on the COVID-19 dynamics in the US. The results obtained,  
543 depicted in Figure 8(a), show a slight increase in the peak number of new daily cases, in comparison to the results  
544 in Figure 7(a), where the effect of waning immunity was not considered. In particular, if the vaccination rate  
545 is 250,000 *per day* (i.e., if  $\xi_v$  is set at  $\xi_v = 7.4 \times 10^{-4}$  *per day*), then the peak number of new cases increases  
546 by approximately 2% (in comparison to the case where no waning immunity is considered), and the time-to-  
547 elimination of the pandemic increases by about 13 days (compare blue curves in Figures 7(a) and 8(a)). If the daily  
548 vaccination rate is increased to one million *per day* (i.e., if  $\xi_v = 3.0 \times 10^{-3}$  *per day*), then the peak new cases  
549 increases by up to 6% (in comparison to the case with no waning immunity) and the time-to-elimination increases  
550 by about a month (compare green curves in Figures 7(a) and 8(a)). The increases in burden and time-to-extinction  
551 in this case (with 1 million vaccinated daily, in comparison to the case with 250,000 people getting vaccinated daily)  
552 is due to the fact waning of both natural and vaccine-derived immunity causes a corresponding increase in the pool  
553 of susceptible individuals who can acquire infection (thereby increasing number of new cases and extending time-  
554 to-elimination). Thus, these simulations show that waning of natural and vaccine-derived immunity cause only a  
555 marginal increase in the burden and time-to-elimination of the pandemic.

#### 556 4.5.2 Mask fatigue and relaxation of mask mandates for fully-vaccinated individuals

557 To incorporate the effect of mask fatigue, or relaxation of mask mandates [43], in fully-vaccinated individuals into  
558 the model (2.5)-(2.6), we consider the *worst-case* scenario where all fully-vaccinated individuals opt to give up  
559 masking in public. To account for the worst case scenario of this (i.e., the case in which every fully-vaccinated  
560 individual abandons masking) in the model, we remove the state variable  $S_{2v}$ , for the vaccinated susceptible in-  
561 dividuals in the mask-wearing group 2, from the model. Further, we re-direct all the new vaccinated individuals  
562 from group 2 into the vaccinated class of the non-masking group 1 (i.e., we add the term  $\xi_v S_{2u}$  from the equation  
563 for the rate of change of the  $S_{2u}$  population to that for the rate of change of the  $S_{1v}$  population, and the equation  
564 for  $S_{2v}$  is removed from the model) and also remove the term  $-\alpha_{12} S_{1v}$  from the equation for the rate of change  
565 of the  $S_{1v}$  population (to ensure that vaccinated individuals in group 1 do not move to the mask-wearing group 2).  
566 Simulations of the model (2.5)-(2.6), under this setting (and using the parameter values in Tables 3 and 4), depicted

567 in Figure 8(b), show a marginal change in the peak number of new cases and the time-to-elimination, in comparison  
568 to the case when fully-vaccinated individuals do not completely give up masking (i.e., compare Figure 8(b) with  
569 Figure 7(a)).

### 570 4.5.3 Therapeutic benefits of COVID-19 vaccines

571 Result from recent clinical trials have shown very promising therapeutic benefits for both the Pfizer and Moderna  
572 vaccines [15, 16]. In this section, we seek to use the multi-group model (2.5)-(2.6) to assess the impact of such  
573 benefits on the dynamics of the disease in the US. Since the model does not explicitly stratify the population of  
574 infected individuals according to whether they are vaccinated or not, a number of factors will come into play when  
575 estimating the overall impact of the therapeutic benefits, such as the high efficacy of the two vaccines (approx-  
576 imately 95%, thereby significantly reducing the size of breakthrough infections), level of vaccine hesitancy in the  
577 community and the current daily infection rate in the community. Taking all these into account, we consider it  
578 plausible, as a first approximation, to estimate the overall therapeutic benefits in the US, at the beginning of the  
579 third wave (characterized by low vaccination coverage (December 2020 until about February 2021), high disease  
580 burden (skyrocketing number of reported confirmed cases, hospitalizations and COVID-19 mortality), by a 5%  
581 reduction in severe or symptomatic illness, breakthrough transmission, hospitalization, and mortality, as well as a  
582 5% increase in the rate of recovery from infection for vaccinated infected individuals. In other words, the effect of  
583 therapeutic benefits of the vaccine is incorporated into our model by reducing the baseline values of the parameters  
584 related to development of severe disease ( $r$ ), hospitalization ( $\phi_{jI}$ ,  $j = 1, 2$ ) and mortality  $\delta_{jI}$  and  $\delta_{jH}$  with  $j = 1, 2$ )  
585 by 5%, in addition to increasing the baseline value of the parameter related to the recovery rate ( $\gamma_{jI}$ ,  $\gamma_{jA}$  and  $\gamma_{jH}$ ,  
586 with  $j = 1, 2$ ). The simulation results obtained, for this hypothetical scenario, show a marked reduction in disease  
587 burden and a decrease in time-to-elimination (8(c)), in comparison to the case where such therapeutic benefits are  
588 not accounted for (Figure 7(a)). In particular, if one million people are vaccinated daily (i.e., if the vaccination rate  
589 is set at  $\xi_v = 3.0 \times 10^{-3}$  per day), up to 37% decrease in the peak number of new cases could be achieved. Further,  
590 the time-to-elimination decreases by 17 days (compare green curves in Figures 7(a) and 8(a)). Higher reductions  
591 in disease burden, and more accelerated time-to-elimination, will be achieved if higher percentages of therapeutic  
592 benefits are assumed. It should be mentioned that a more rigorous way to introduce the impact of therapeutic ben-  
593 efits into the multi-group model (2.5)-(2.6) will be to further restructure the infected compartments of the model in  
594 terms of whether they are vaccinated or not (doing so will result in a model with at least 28 nonlinear differential  
595 equations, which may be difficult to track mathematically and statistically).

596 In summary, it is shown in this section (based on the parameter values used in our simulations) that, while  
597 waning natural and vaccine-derived immunity generally induces a relatively small increase in the burden of the  
598 pandemic, together with a correspondingly marginal increase in the time-to-elimination (in comparison to the case  
599 when these effects are not incorporated into the model), the therapeutic benefits of the vaccines offer a dramatic  
600 impact on the trajectory of the disease (by significantly reducing both the burden and time-to-elimination of the  
601 pandemic, in comparison to the case when such benefits are not accounted for in the model). Finally, it is worth  
602 stating that, although the simulations carried out in Section 4.5 are for the Pfizer and Moderna COVID-19 vaccines  
603 only (illustrated in Figure 7), similar simulations can also be carried out for the AstraZeneca and other vaccines  
604 with lower preventive effective efficacies. These simulations will, of course, show higher disease burden (owing to  
605 their reduced efficacy), in comparison to the case when Pfizer and Moderna vaccines are used.

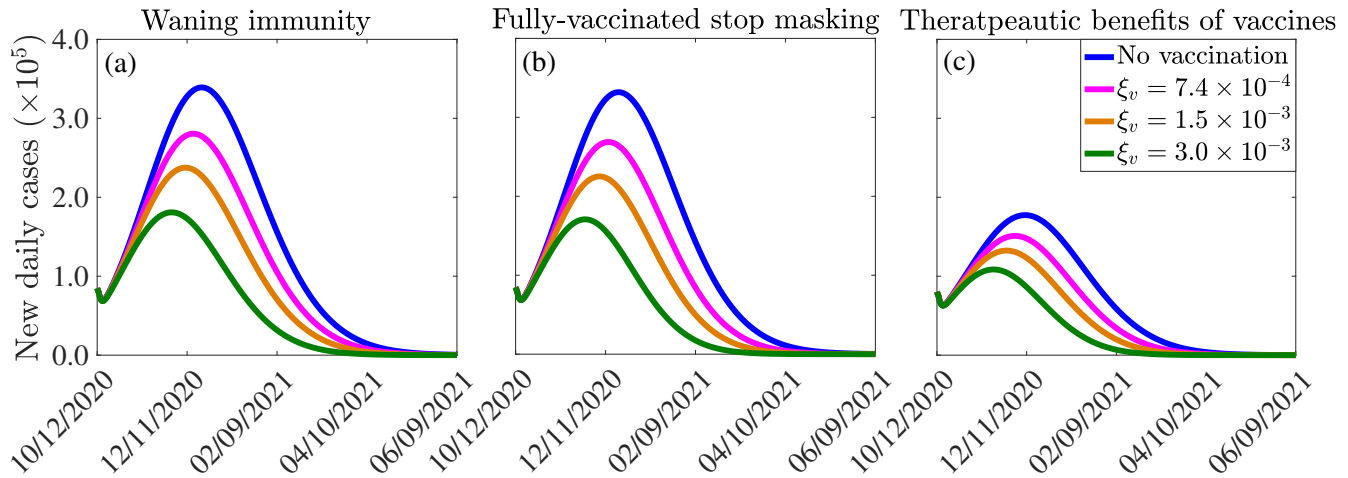

Figure 8: Effect of (a) vaccine-induced and natural immunity waning, (b) unmasking by vaccinated individuals, and (c) therapeutic benefits of vaccines on the burden of the pandemic and the time-to-elimination. The vaccination rates  $\xi_v = 7.4 \times 10^{-4}, 1.5 \times 10^{-3}, 3.0 \times 10^{-3}$ , *per day* correspond, respectively, to vaccinating approximately  $2.5 \times 10^5, 5.0 \times 10^5, 1.0 \times 10^6$  people *per day*. The vaccine-induced and natural immunity waning rate parameters,  $\omega_v$  and  $\omega_r$ , are set to  $\omega_v = 1/180$  *per day* [40] and  $\omega_r = 1/270$  *per day* [42], respectively. The effect of therapeutic benefits of the vaccine depicted in (c) is incorporated by reducing the baseline values of the parameters (from Tables 3-4) that are related to development of severe disease ( $r$ ), hospitalization ( $\phi_{jI}, j = 1, 2$ ) and mortality ( $\delta_{jI}, \delta_{jH}, j = 1, 2$ ) by 5%, in addition to increasing the baseline value of the parameters related to the recovery rate ( $\gamma_{jI}, \gamma_{jA}, \gamma_{jH}, j = 1, 2$ ) by 5%. The values of the other parameters of the model used in the simulation are as given in Tables 3-4.

## 5 Discussion and Conclusions

Since its emergence late in December of 2019, the novel Coronavirus pandemic continues to inflict devastating public health and economic burden across the world. As of January 24, 2021, the pandemic accounted for over 100 million confirmed cases and 2.1 million fatalities globally (the United States accounted for 25, 123, 857 confirmed cases and 419, 204 deaths). Although control efforts against the pandemic have focused on the use of non-pharmaceutical interventions, such as social-distancing, face mask usage, quarantine, self-isolation, contact-tracing, community lockdowns, etc., a number of highly-efficacious and safe anti-COVID-19 vaccines have been developed and approved for use in humans. In particular, the two FDA-approved vaccines (manufactured by Moderna Inc. and Pfizer Inc.) have estimated protective efficacy of about 95%. Furthermore, AstraZeneca vaccine, developed by the pharmaceutical giant, AstraZeneca and University of Oxford (which is currently being used in the UK and other countries) has protective efficacy of 70%. Mathematics (modeling, analysis and data analytics) has historically been used to provide robust insight into the transmission dynamics and control of infectious diseases, dating back to the pioneering works of the likes of Daniel Bernoulli in the 1760s (on smallpox immunization), Sir Ronald Ross and George Macdonald between the 1920s and 1950s (on malaria modeling) and the compartmental modeling framework developed by Kermack and McKendrick in the 1920s [45–47]. In this study, we used mathematical modeling approaches, coupled with rigorous analysis, to assess the potential population-level impact of the use of the three currently-available vaccines in curtailing the burden of the COVID-19 pandemic in the U.S. We have also assessed the impact of other non-pharmaceutical interventions, such as face mask and social-distancing, implemented singly or in combination with any of the three vaccines, on the dynamics and control of the pandemic.

We developed a novel mathematical model, which stratifies the total population into two subgroups of individuals who habitually wear face masks in public and those who do not. The resulting two group COVID-19 vaccination model, which takes the form of a deterministic system of nonlinear ordinary differential equations, was initially fitted using observed cumulative COVID-induced mortality data for the U.S. Specifically, we fitted

629 the model with the cumulative data corresponding to the period when the U.S. was experiencing the third wave  
630 of the COVID-19 pandemic (estimated to have started around October 12, 2020). In addition to allowing for the  
631 assessment of the population-level of each of the three currently-available vaccines, the model also allows for the  
632 assessment of the initial size of the population of individuals who habitually wear face masks in public, as well as  
633 assessing the impact of increase in the baseline social-distancing compliance attained as of October 12, 2020. After  
634 the successful calibration of the model, we carried out rigorous asymptotic stability analysis to gain insight into  
635 the main qualitative features of the model. In particular, we showed that the disease-free equilibrium of the model  
636 is locally-asymptotically stable whenever a certain epidemiological threshold, known as the *control reproduction*  
637 *number* (denoted by  $\mathcal{R}_c$ ), is less than unity. The implication of this result is that (for the case when  $\mathcal{R}_c < 1$ ), a  
638 small influx of COVID-infected individuals will not generate an outbreak in the community.

639 The expression for the reproduction number ( $\mathcal{R}_c$ ) was used to compute the nationwide vaccine-induced *herd*  
640 *immunity* threshold for a special case of the model where change of masking behavior is not allowed. The herd  
641 immunity threshold represents the minimum proportion of the susceptible U.S. population that needs to be vac-  
642 cinated to ensure elimination of the pandemic. Simulations of our model showed, for the current baseline level  
643 of social-distancing in the U.S. (and baseline level of initial size of the population of face masks wearers), herd  
644 immunity can be achieved in the U.S. using the AstraZeneca vaccine if at least 80% of the susceptible population  
645 is vaccinated. The threshold herd immunity level needed when either the Pfizer or Moderna vaccine is used re-  
646 duces to 59%. Our simulations further showed that the level of herd immunity needed to eliminate the pandemic  
647 decreases, for each of the three currently-available vaccines, with increasing levels of baseline social-distancing  
648 compliance. In particular, the baseline social-distancing achieved at the beginning of our simulation period (i.e.,  
649 the level of social-distancing in the U.S. as of October 12, 2020) is increased by 10%, the herd immunity require-  
650 ment for the AstraZeneca or Pfizer/Moderna vaccine reduced, respectively, to 73% and 54%. Furthermore, if the  
651 baseline social-distancing is increased by 30%, the herd immunity threshold needed to eliminate the pandemic  
652 using the AstraZeneca or Pfizer/Moderna vaccine reduced to a mere 53% and 39%, respectively. In other words,  
653 this study showed that the prospect of achieving vaccine-derived herd immunity, using any of the three currently-  
654 available vaccines, is very promising, particularly if the vaccination program is complemented with increased levels  
655 of baseline social-distancing.

656 The multigroup nature of the model we developed in this study, where the total population is stratified into  
657 the two groups of those who habitually face mask in public and those who do not (with back-and-forth transitions  
658 between the two groups allowed), enabled us to assess the population-level impact of the initial sizes of the two  
659 groups in curtailing the spread of the pandemic in the United States. We assessed this by simulating the model  
660 during the beginning of the third wave of the pandemic in the U.S. (starting from October 12, 2020), and used the  
661 proportion of masks-wearers embedded in the cumulative mortality data we used to fit the model as the baseline.  
662 Our study emphasized the fact that early adoption of mask mandate plays a major role in effectively reducing the  
663 burden (as measured in terms of cumulative mortality) of the pandemic. This effect is particularly more pronounced  
664 when individuals in the face masks-wearing group do not change their behavior and transition to the non-mask  
665 wearing group (and non-mask wearers adopt a masks-wearing habit). Our study further showed that, for the case  
666 where the aforementioned back-and-forth transitions between the masks-wearing and the non-mask wearing groups  
667 is allowed, there is a threshold level of the initial size of the proportion of face masks-wearers above which the  
668 disease burden will be reduced, below which the disease burden actually increases. Our study estimated this  
669 threshold value of the initial size of the masks-wearing group to be about 50%. The epidemiological implication of  
670 this result is that the continued implementation of face masks use strategy (particularly at the high initial coverage  
671 level) will be highly beneficial in effectively curtailing the pandemic burden between now and the time when the  
672 two FDA-approved vaccines become widely available to the general public in the U.S. (expected to be around mid  
673 March to mid April of 2021).

674 We further showed that the time-to-elimination of COVID-19 in the U.S., using a vaccine (and a non-pharmaceutical  
675 intervention), depended on the daily vaccination rate (i.e., number of people vaccinated *per* day) and the level of  
676 increase in baseline social-distancing compliance achieved at the onset of the third wave of the pandemic (October  
677 12, 2020). Specifically, our study showed that the COVID-19 pandemic can be eliminated in the U.S. by early May  
678 of 2021 if we are able to achieve moderate level of daily vaccination rate (such as vaccinating 1 million people



679 every day) and the baseline social-distancing compliance achieved on October 12, 2020 is increased by 10% (and  
680 sustained). It should, however, be mentioned that the time-to-elimination is sensitive to the level of community  
681 transmission of COVID-19 in the population (it is also sensitive to the effectiveness and coverage (compliance)  
682 levels of the other (non-pharmaceutical) interventions, particularly face mask usage and social-distancing compli-  
683 ance, implemented in the community). Specifically, our study was carried out during the months of November and  
684 December of 2020, when the United States was experiencing a devastating third wave of the COVID-19 pandemic  
685 (recording on average over 200,000 confirmed cases *per* day, together with record numbers of hospitalizations and  
686 COVID-induced mortality). This explains the somewhat *longer* estimated time-to-elimination of the pandemic,  
687 using any of the three currently-available vaccines, for the case where social-distancing compliance is kept at the  
688 baseline level. The estimate for the time-to-elimination (using any of the three currently-available vaccines) will be  
689 shorter if the community transmission is significantly reduced (as will be vividly evident from the reduced values  
690 of the transmission-related and mortality-related parameters of the re-calibrated version of our model).

691 It is worth emphasizing that at the time this study was carried out (December 2020), it was unclear whether  
692 natural or vaccine-induced immunity to COVID-19 waned over time. It was also unclear whether the then new  
693 vaccines that received FDA's Emergency Use Authorization (Pfizer and Moderna) offer therapeutic benefits (such  
694 as reducing severe disease, hospitalization and deaths, in addition to accelerating recovery rate in vaccinated in-  
695 fected individuals). However, by the time we are reviewing the manuscript (June 2021), new data and studies  
696 have provided clarity on waning immunity to COVID-19 [41, 42] and on the therapeutic benefits of some of the  
697 COVID-19 vaccines [15, 16]. Furthermore, the U.S. Centers for Disease Control and Prevention has modified its  
698 guidelines on masking, allowing fully-vaccinated individuals not to wear masks under certain circumstances [43].  
699 Consequently, we adapted the multi-group model we developed to allow for the assessment of the aforementioned  
700 new facts associated with the COVID-19 dynamics. Specifically, we adapted and simulated the model to assess  
701 the impact of waning immunity (both natural and vaccine-derived), mask fatigue and relaxation of mask mandates  
702 for fully-vaccinated individuals and the therapeutic benefits of the FDA-authorized vaccines on the disease burden  
703 (measured in terms of peak daily cases) and time-to-elimination of the pandemic in the US. The simulations were  
704 carried out for the hypothetical scenario that the vaccination program was started at the beginning of the third  
705 wave of the pandemic in the US (i.e., in October of 2020). Since the vaccines were not available until December  
706 2020, and large scale vaccine rollout was only achieved some time in end of March 2021 or early April 2021, we  
707 adapted our conclusions appropriately to account for this time lag. Consequently, our simulation results, for these  
708 settings, show that, while waning natural and vaccine-derived immunity induces only a relatively marginal increase  
709 in both the burden and time-to-elimination of the pandemic, incorporating therapeutic benefits of the vaccine into  
710 the model causes a dramatic reduction in both the burden and time-to-elimination. If the impacts of therapeutic  
711 benefits are incorporated into the model from the very beginning of the third wave of the pandemic (October 2020),  
712 our simulations show that the pandemic could theoretically be eliminated in the US by as early as late May, 2021  
713 (note that, in the absence of such therapeutic benefits, our study estimated the time-to-elimination to be some time  
714 in October, 2021).

715 In summary, our study suggest that the prospects of COVID-19 elimination in the U.S. is very promising, using  
716 any of the three currently-available vaccines. The elimination prospects are greatly enhanced if the therapeutic  
717 benefits of the approved vaccines are incorporated into the multi-group model we developed and used in this  
718 study. While, for the baseline scenario, the AstraZeneca vaccine requires at least 80% of the US population to  
719 be vaccinated to achieve herd immunity (needed for the elimination of the pandemic), such herd immunity can  
720 be achieved using any of the two FDA-approved vaccines (Pfizer or Moderna) if only 59% of Americans are  
721 vaccinated. The prospects of eliminating COVID-19 using any of the three vaccines is greatly enhanced if the  
722 vaccination program is combined with a social-distancing strategy that increases the baseline compliance level of  
723 the social-distancing attained during the beginning of the third wave of the COVID-19 pandemic in the United  
724 States. In fact, our simulations strongly suggest that COVID-19 can be eliminated in the U.S. in 2021, and as early  
725 as May 2021, depending on the level of increase in baseline social-distancing compliance. In other words, if we  
726 can continue to maintain social-distancing, while large scale vaccination is being implemented, COVID-19 can be  
727 history...and life can begin to return to normalcy or near-normalcy, in the spring or fall of 2021.

728 Some of the limitations of our model include not explicitly accounting for some important heterogeneities, such

729 as age-structure, risk-structure, and vaccine dose structure, and the impacts of SARS-CoV-2 variants. Accounting  
730 for these may alter our results, especially during the early days of the vaccine administration (e.g., from December  
731 2020 to April 2021) when the vaccine doses were generally in limited supply and needed to be prioritized to  
732 high-risk groups. Hence, our simulation results and conclusions should be interpreted with these limitations in  
733 mind. Further, while our multi-group model did not explicitly account for some other factors potentially relevant  
734 to COVID-19 dynamics, such as waning of natural and vaccine-derived immunity to COVID-19, mask fatigue and  
735 relaxation of mask mandates for fully-vaccinated individuals and the impacts of therapeutic benefits of the approved  
736 vaccines, our multi-group model was robust enough to allow for the assessment of these factors. We showed that,  
737 while incorporating waning of immunity and mask fatigue and relaxation of mask mandates in fully-vaccinated  
738 individuals in the model we developed only caused a marginal increase in disease burden and time-to-elimination,  
739 incorporating the impacts of the therapeutic benefits of the approved vaccines (even at a relatively low overall rate)  
740 resulted in a dramatic reduction in both the disease burden and time-to-elimination of the pandemic.

## 741 **Acknowledgments**

742 One of the authors (ABG) acknowledge the support, in part, of the Simons Foundation (Award #585022) and  
743 the National Science Foundation (Grant Number: DMS-2052363). CNN acknowledges the support of the Simons  
744 Foundation (Award #627346). GAN acknowledge the grants and support of the Cameroon Ministry of Higher  
745 Education, through the initiative for the modernisation of research in Higher Education. All authors wish to express  
746 their deepest sympathy to the families of the victims of the SARS-CoV-2, and extend profound appreciation to the  
747 frontline healthcare workers for their heroic effort and sacrifices to save the lives of others. The authors are very  
748 grateful to the two anonymous reviewers for their very constructive comments, which have significantly enhanced  
749 the quality and clarity of the manuscript.

750 **Appendix I: Entries of the Non-negative Matrix  $F$**

$$\begin{aligned}
 f_1 &= \beta_{P_1} \left[ \frac{S_{1u}^* + (1 - \epsilon_v)S_{1v}^*}{N^*} \right], f_2 = \beta_{I_1} \left[ \frac{S_{1u}^* + (1 - \epsilon_v)S_{1v}^*}{N^*} \right], f_3 = \beta_{A_1} \left[ \frac{S_{1u}^* + (1 - \epsilon_v)S_{1v}^*}{N^*} \right], \\
 f_4 &= \beta_{H_1} \left[ \frac{S_{1u}^* + (1 - \epsilon_v)S_{1v}^*}{N^*} \right], f_5 = (1 - \epsilon_0)\beta_{P_2} \left[ \frac{S_{1u}^* + (1 - \epsilon_v)S_{1v}^*}{N^*} \right], \\
 f_6 &= (1 - \epsilon_0)\beta_{I_2} \left[ \frac{S_{1u}^* + (1 - \epsilon_v)S_{1v}^*}{N^*} \right], f_7 = (1 - \epsilon_0)\beta_{A_2} \left[ \frac{S_{1u}^* + (1 - \epsilon_v)S_{1v}^*}{N^*} \right], \\
 f_8 &= (1 - \epsilon_0)\beta_{H_2} \left[ \frac{S_{1u}^* + (1 - \epsilon_v)S_{1v}^*}{N^*} \right], g_1 = (1 - \epsilon_i)\beta_{P_1} \left[ \frac{S_{2u}^* + (1 - \epsilon_v)S_{2v}^*}{N^*} \right], \\
 g_2 &= (1 - \epsilon_i)\beta_{I_1} \left[ \frac{S_{2u}^* + (1 - \epsilon_v)S_{2v}^*}{N^*} \right], g_3 = (1 - \epsilon_i)\beta_{A_1} \left[ \frac{S_{2u}^* + (1 - \epsilon_v)S_{2v}^*}{N^*} \right], \\
 g_4 &= (1 - \epsilon_i)\beta_{H_1} \left[ \frac{S_{2u}^* + (1 - \epsilon_v)S_{2v}^*}{N^*} \right], g_5 = (1 - \epsilon_i)(1 - \epsilon_0)\beta_{P_2} \left[ \frac{S_{2u}^* + (1 - \epsilon_v)S_{2v}^*}{N^*} \right], \\
 g_6 &= (1 - \epsilon_i)(1 - \epsilon_0)\beta_{I_2} \left[ \frac{S_{2u}^* + (1 - \epsilon_v)S_{2v}^*}{N^*} \right], g_7 = (1 - \epsilon_i)(1 - \epsilon_0)\beta_{A_2} \left[ \frac{S_{2u}^* + (1 - \epsilon_v)S_{2v}^*}{N^*} \right], \\
 g_8 &= (1 - \epsilon_i)(1 - \epsilon_0)\beta_{H_2} \left[ \frac{S_{2u}^* + (1 - \epsilon_v)S_{2v}^*}{N^*} \right].
 \end{aligned}$$

751 **References**

- 752 [1] “Center for Systems Science and Engineering at Johns Hopkins University. COVID-19,” (2020).  
 753 [Online Version](#)
- 754 [2] Centers for Disease Control and Prevention, “Scientific brief: SARS-CoV-2 transmission,” CDC information  
 755 (Published on May 7, 2021 and accessed on June 12, 2021).  
 756 [Online Version](#)
- 757 [3] Centers for Disease Control and Prevention, “Coronavirus disease 2019 (COVID-19),” National Center for  
 758 Immunization and Respiratory Diseases (NCIRD), Division of Viral Diseases (Accessed on March 4, 2020).  
 759 [Online Version](#)
- 760 [4] C. N. Ngonghala, E. Iboi, S. Eikenberry, M. Scotch, C. R. MacIntyre, M. H. Bonds, and A. B. Gumel,  
 761 “Mathematical assessment of the impact of non-pharmaceutical interventions on curtailing the 2019 novel  
 762 coronavirus,” *Mathematical Biosciences*. **325**, 108364 (2020).
- 763 [5] Centers for Disease Control and Prevention, “Different COVID-19 vaccines,” CDC information (Accessed on  
 764 January 25, 2021).  
 765 [Online Version](#)
- 766 [6] US Food and Drug Administration, “FDA takes key action in fight against COVID-19 by issuing emergency  
 767 use authorization for first COVID-19 vaccine,” FDA Office of Media Affairs (Accessed on January 25, 2021).  
 768 [Online Version](#)
- 769 [7] S. E. Eikenberry, M. Muncuso, E. Iboi, T. Phan, E. Kostelich, Y. Kuang, and A. B. Gumel, “To mask or not  
 770 to mask: Modeling the potential for face mask use by the general public to curtail the COVID-19 pandemic,”  
 771 *Infectious Disease Modeling* **5**, 293–308 (2020).

- 772 [8] C. N. Ngonghala, E. Iboi, and A. B. Gumel, “Could masks curtail the post-lockdown resurgence of covid-19  
773 in the US?” *Mathematical Biosciences* **329**, 108452 (2020).
- 774 [9] E. A. Iboi, C. N. Ngonghala, and A. B. Gumel, “Will an imperfect vaccine curtail the COVID-19 pandemic  
775 in the US?” *Infectious Disease Modelling* **5**, 510–524 (2020).
- 776 [10] Pfizer, “Pfizer and BioNTech to Submit Emergency Use Authorization Request Today to the U.S. FDA for  
777 COVID-19 Vaccine,” (2020).  
778 [Online Version](#)
- 779 [11] National Institute of Health, “Promising Interim Results from Clinical Trial of NIH-Moderna COVID-19  
780 Vaccine,” (2020).  
781 [Online Version](#)
- 782 [12] AstraZeneca, “AZD1222 Vaccine Met Primary Efficacy Endpoint in Preventing COVID-19,” (2020).  
783 [Online Version](#)
- 784 [13] Graham Lawton, “Everything you Need to Know About the Pfizer/BioNTech COVID-19 Vaccine,” (2020).  
785 [Online Version](#)
- 786 [14] Moderna, “Moderna Announces Longer Shelf Life for its COVID-19 Vaccine Candidate at Refrigerated Tem-  
787 peratures,” (2020).  
788 [Online Version](#)
- 789 [15] Centers for Disease Control and Prevention, “Benefits of getting a COVID-19 vaccine,” CDC information  
790 (Accessed on June 11, 2021).  
791 [Online Version](#)
- 792 [16] N. Dagan, N. Barda, E. Kepten, O. Miron, S. Perchik, M. A. Katz, M. A. Hernán, M. Lipsitch, B. Reis,  
793 and R. D. Balicer, “BNT162b2 mRNA COVID-19 vaccine in a nationwide mass vaccination setting,” *New  
794 England Journal of Medicine* **384**, 1412–1423 (2021).
- 795 [17] A. Srivastava and G. Chowell, “Understanding spatial heterogeneity of COVID-19 pandemic using shape  
796 analysis of growth rate curves,” *medRxiv* (2020).
- 797 [18] A. B. Gumel, E. A. Iboi, C. N. Ngonghala, and E. H. Elbasha, “A primer on using mathematics to understand  
798 covid-19 dynamics: Modeling, analysis and simulations,” *Infectious Disease Modelling* **6**, 148–168 (2021).
- 799 [19] K. A. Schneider, G. A. Ngwa, M. Schwehm, L. Eichner, and M. Eichner, “The covid-19 pandemic prepared-  
800 ness simulation tool: Covidsim,” *BMC Infectious Diseases* (2020).
- 801 [20] C. N. Ngonghala, P. Goel, D. Kutor, and S. Bhattacharyya, “Human choice to self-isolate in the face of the  
802 COVID-19 pandemic: A game dynamic modelling approach,” *Journal of Theoretical Biology* **521**, 110692  
803 (2021).  
804 [Online Version](#)
- 805 [21] J. Hellewell, S. Abbott, A. Gimma, N. I. Bosse, C. I. Jarvis, T. W. Russell, J. D. Munday, A. J. Kucharski, W. J.  
806 Edmunds, F. Sun, et al., “Feasibility of controlling COVID-19 outbreaks by isolation of cases and contacts,”  
807 *The Lancet Global Health* **8**, E488–E496 (2020).
- 808 [22] A. J. Kucharski, T. W. Russell, C. Diamond, Y. Liu, J. Edmunds, S. Funk, R. M. Eggo, F. Sun, M. Jit, J. D.  
809 Munday, et al., “Early dynamics of transmission and control of COVID-19: a mathematical modelling study,”  
810 *The Lancet Infectious Diseases* **20**, 553–558 (2020).

- 811 [23] L. Xue, S. Jing, J. C. Miller, W. Sun, H. Li, J. G. Estrada-Franco, J. M. Hyman, and H. Zhu, “A data-driven  
812 network model for the emerging covid-19 epidemics in Wuhan, Toronto and Italy,” *Mathematical Biosciences*  
813 **326**, 108391 (2020).
- 814 [24] N. M. Ferguson, D. Laydon, G. Nedjati-Gilani, N. Imai, K. Ainslie, M. Baguelin, S. Bhatia, A. Boonyasiri,  
815 Z. Cucunubá, G. Cuomo-Dannenburg, et al., “Impact of non-pharmaceutical interventions (NPIs) to reduce  
816 COVID-19 mortality and healthcare demand,” London: Imperial College COVID-19 Response Team, March  
817 **16** (2020).
- 818 [25] H. T. Banks, M. Davidian, J. R. Samuels, and K. L. Sutton, *An Inverse Problem Statistical Methodology*  
819 *Summary*, 249–302 (Springer Netherlands, Dordrecht, 2009).  
820 [Online Version](#)
- 821 [26] G. Chowell, “Fitting dynamic models to epidemic outbreaks with quantified uncertainty: a primer for param-  
822 eter uncertainty, identifiability, and forecasts,” *Infectious Disease Modelling* **2**, 379–398 (2017).
- 823 [27] C. Zhou, “Evaluating new evidence in the early dynamics of the novel coronavirus COVID-19 outbreak in  
824 Wuhan, China with real time domestic traffic and potential asymptomatic transmissions,” *medRxiv* (2020).
- 825 [28] N. M. Linton, T. Kobayashi, Y. Yang, K. Hayashi, A. R. Akhmetzhanov, S.-m. Jung, B. Yuan, R. Kinoshita,  
826 and H. Nishiura, “Incubation period and other epidemiological characteristics of 2019 novel coronavirus  
827 infections with right truncation: a statistical analysis of publicly available case data,” *Journal of Clinical*  
828 *Medicine* **9**, 538 (2020).
- 829 [29] World Health Organization, “Coronavirus disease 2019 (COVID-19): situation report, 46,” WHO (2020).
- 830 [30] Z. Wu and J. M. McGoogan, “Characteristics of and important lessons from the coronavirus disease 2019  
831 (COVID-19) outbreak in China: summary of a report of 72 314 cases from the Chinese Center for Disease  
832 Control and Prevention,” *JAMA* (2020).
- 833 [31] S. Kissler, C. Tedijanto, E. Goldstein, Y. Grad, and M. Lipsitch, “Projecting the transmission dynamics of  
834 SARS-CoV-2 through the postpandemic period,” *Science* (2020).  
835 [Online Version](#)
- 836 [32] L. Zou, F. Ruan, M. Huang, L. Liang, H. Huang, Z. Hong, J. Yu, M. Kang, Y. Song, J. Xia, et al., “SARS-  
837 CoV-2 viral load in upper respiratory specimens of infected patients,” *New England Journal of Medicine* **382**,  
838 1177–1179 (2020).
- 839 [33] V. Lakshmikantham and A. Vatsala, “Theory of differential and integral inequalities with initial time differ-  
840 ence and applications,” in “Analytic and Geometric Inequalities and Applications,” 191–203 (Springer, 1999).
- 841 [34] H. W. Hethcote, “The mathematics of infectious diseases,” *SIAM Review* **42**, 599–653 (2000).
- 842 [35] P. van den Driessche and J. Watmough, “Reproduction numbers and sub-threshold endemic equilibria for  
843 compartmental models of disease transmission,” *Mathematical Biosciences* **180**, 29–48 (2002).
- 844 [36] O. Diekmann, J. A. P. Heesterbeek, and J. A. Metz, “On the definition and the computation of the basic re-  
845 production ratio  $R_0$  in models for infectious diseases in heterogeneous populations,” *Journal of Mathematical*  
846 *Biology* **28**, 365–382 (1990).
- 847 [37] R. M. Anderson and R. M. May, “Vaccination and herd immunity to infectious diseases,” *Nature* **318**, 323–329  
848 (1985).
- 849 [38] R. M. Anderson, “The concept of herd immunity and the design of community-based immunization pro-  
850 grammes,” *Vaccine* **10**, 928–935 (1992).

- 851 [39] H. Ritchie, E. Ortiz-Ospina, D. Beltekian, E. Mathieu, J. Hasell, B. Macdonald, C. Giattino, and M. Roser,  
852 “Coronavirus (COVID-19) vaccinations,” Statistics and Research, Our World in Data (Accessed on January  
853 24, 2021).
- 854 [40] B. Curley, “How long does immunity from COVID-19 vaccination last?” Healthline (Accessed on June 11,  
855 2021).  
856 [Online Version](#)
- 857 [41] J. Seow, C. Graham, B. Merrick, S. Acors, S. Pickering, K. J. Steel, O. Hemmings, A. O’Byrne, N. Kouphou,  
858 R. P. Galao, et al., “Longitudinal observation and decline of neutralizing antibody responses in the three  
859 months following SARS-CoV-2 infection in humans,” *Nature Microbiology* **5**, 1598–1607 (2020).
- 860 [42] J. M. Dan, J. Mateus, Y. Kato, K. M. Hastie, E. D. Yu, C. E. Faliti, A. Grifoni, S. I. Ramirez, S. Haupt,  
861 A. Frazier, C. Nakao, V. Rayaprolu, S. A. Rawlings, B. Peters, F. Krammer, V. Simon, E. O. Saphire, D. M.  
862 Smith, D. Weiskopf, A. Sette, and S. Crotty, “Immunological memory to SARS-CoV-2 assessed for up to 8  
863 months after infection,” *Science* **371** (2021).  
864 [Online Version](#)
- 865 [43] Centers for Disease Control and Prevention, “Interim public health recommendations for fully vaccinated  
866 people,” CDC information (Accessed on June 11, 2021).  
867 [Online Version](#)
- 868 [44] M. W. Tenforde, “Effectiveness of Pfizer-BioNTech and Moderna vaccines against COVID-19 among hospi-  
869 talized adults aged  $\geq 65$  years—United States, January–March 2021,” *Morbidity and mortality weekly report*  
870 **70** (2021).
- 871 [45] D. Bernoulli, “Essai d’une nouvelle analyse de la mortalité causée par la petite vérole, et des avantages de  
872 l’inoculation pour la prévenir,” *Histoire de l’Acad., Roy. Sci.* 1–45 (1760).
- 873 [46] R. Ross, *The prevention of malaria* (John Murray, 1911).
- 874 [47] W. O. Kermack and A. G. McKendrick, “A contribution to the mathematical theory of epidemics,” *Proceed-*  
875 *ings of the Royal Society of London. Series A, Containing papers of a mathematical and physical character*  
876 **115**, 700–721 (1927).
